1 **Molecular mechanism of microtubule nucleation from gamma-tubulin ring complex**

2

3 Akanksha Thawani<sup>1</sup>, Howard A Stone<sup>2</sup>, Joshua W Shaevitz<sup>3,4</sup>, Sabine Petry<sup>5,\*</sup>

4

5 <sup>1</sup>Department of Chemical and Biological Engineering, Princeton University

6 <sup>2</sup>Department of Mechanical and Aerospace Engineering, Princeton University

7 <sup>3</sup>Lewis-Sigler Institute for Integrative Genomics, Princeton University

8 <sup>4</sup>Department of Physics, Princeton University

9 <sup>5</sup>Department of Molecular Biology, Princeton University, United States

10

11 \* Correspondence to: Sabine Petry ([spetry@princeton.edu](mailto:spetry@princeton.edu))

## 12 **Abstract**

13 Determining how microtubules (MTs) are nucleated is essential for understanding how the  
14 cytoskeleton assembles. Yet, half a century after the discovery of MTs and  $\alpha\beta$ -tubulin subunits  
15 and decades after the identification of the  $\gamma$ -tubulin ring complex ( $\gamma$ -TuRC) as the universal MT  
16 nucleator, the underlying mechanism largely remains a mystery. Using single molecule studies,  
17 we uncover that  $\gamma$ -TuRC nucleates a MT more efficiently than spontaneous assembly. The laterally  
18 interacting array of  $\gamma$ -tubulins on  $\gamma$ -TuRC facilitates the lateral association of  $\alpha\beta$ -tubulins, while  
19 longitudinal affinity between  $\gamma/\alpha\beta$ -tubulin is surprisingly weak. During nucleation, 3-4  $\alpha\beta$ -tubulin  
20 dimers bind stochastically to  $\gamma$ -TuRC on average until two of them create a lateral contact and  
21 overcome the nucleation barrier. Although  $\gamma$ -TuRC defines the nucleus, XMAP215 significantly  
22 increases reaction efficiency by facilitating  $\alpha\beta$ -tubulin incorporation. In sum, we elucidate how  
23 MT initiation occurs from  $\gamma$ -TuRC and determine how it is regulated.

## 24 **Introduction**

25 Microtubules (MTs) enable cell division, motility, intracellular organization and transport. MTs  
26 were found to consist of  $\alpha\beta$ -tubulin dimers fifty years ago, yet, how MTs are nucleated in the cell  
27 to build the cytoskeleton remains poorly understood<sup>1-3</sup>.

28 MTs assemble spontaneously from  $\alpha\beta$ -tubulin subunits *in vitro* via the cooperative assembly  
29 of many tubulin dimers and hence this process displays a kinetic barrier<sup>4-8</sup>. Consequently,  
30 spontaneous MT nucleation is rarely observed in cells<sup>9,10</sup>. Instead, the major MT nucleator  $\gamma$ -  
31 tubulin is required *in vivo*<sup>9-11</sup>.  $\gamma$ -tubulin forms a 2.2 megadalton, ring-shaped complex with  $\gamma$ -  
32 tubulin complex proteins (GCPs), known as the  $\gamma$ -Tubulin Ring Complex ( $\gamma$ -TuRC)<sup>12-16</sup>.  $\gamma$ -TuRC  
33 has been proposed to template the assembly of  $\alpha\beta$ -tubulin dimers into a ring, resulting in nucleation  
34 of a MT<sup>15-21</sup>. However, kinetic measurements that provide direct evidence for this hypothesis have  
35 been lacking and several important questions about how  $\gamma$ -TuRC nucleates MTs have remained  
36 unanswered.

37 In the absence of purified  $\gamma$ -TuRC and an assay to visualize MT nucleation events from  
38 single  $\gamma$ -TuRC molecules in real time, recent studies used alternative MT assembly sources, such  
39 as spontaneous MT assembly or stabilized MTs with blunt ends hypothesized to resemble the  $\gamma$ -  
40 TuRC interface. Based on these alternatives, competition between growth and catastrophe of the  
41 nascent plus-end was proposed to yield the nucleation barrier in the cell<sup>22,23</sup>, but this has not been  
42 examined with the nucleator  $\gamma$ -TuRC. Recently, the MT polymerase XMAP215 was identified as  
43 an essential MT nucleation factor *in vivo*, which synergistically nucleates MTs with  $\gamma$ -TuRC<sup>24-26</sup>.  
44 Yet, the specific roles of XMAP215 and  $\gamma$ -TuRC in MT nucleation have yet to be discovered.

45 To explore the mechanism of MT nucleation, we reconstituted and visualized MT nucleation  
46 by  $\gamma$ -TuRC live with single molecule resolution. We uncover the molecular composition of the

47 MT nucleus, and determine the roles XMAP215 and  $\gamma$ -TuRC in MT nucleation.

48

## 49 **Results**

50

### 51 **Reconstituting and visualizing microtubule nucleation from $\gamma$ -TuRC**

52 To study how  $\gamma$ -TuRC nucleates MTs (Fig. 1A), we purified endogenous  $\gamma$ -TuRC from *Xenopus*  
53 egg extracts and biotinylated the complexes to immobilize them on functionalized glass (Fig. S1A-  
54 C). Upon perfusing fluorescent  $\alpha\beta$ -tubulin, we visualized MT nucleation live with total internal  
55 reflection fluorescence microscopy (TIRFM). Strikingly, MT nucleation events occurred  
56 specifically from single  $\gamma$ -TuRC molecules (Fig. 1B; Fig. S1D and Movie S1-2). Kymographs  
57 revealed that attached  $\gamma$ -TuRC assembled  $\alpha\beta$ -tubulin into a MT *de novo* starting from zero length  
58 within the diffraction limit of light microscopy (Fig. 1C), ruling out an alternative model where  
59 MTs first spontaneously nucleate and then become stabilized via  $\gamma$ -TuRC. By observing the  
60 fiduciary marks on the MT lattice (Fig. 1C) and generating polarity-marked MTs from attached  $\gamma$ -  
61 TuRC (Fig. S1E), we showed that  $\gamma$ -TuRC caps the MT minus-end, while only the plus-end  
62 polymerizes. Altogether, our results show that  $\gamma$ -TuRC directly nucleates MTs.

63

### 64 **Defining the microtubule nucleus on $\gamma$ -TuRC**

65 To determine how  $\gamma$ -TuRC nucleates MTs, we measured the kinetics of MT nucleation for a  
66 constant density of  $\gamma$ -TuRC and increasing  $\alpha\beta$ -tubulin concentration (Fig. 1D and Movie S3).  
67 Surprisingly,  $\gamma$ -TuRC nucleated MTs starting from 7  $\mu$ M tubulin (Fig. 1D), which is higher than  
68 the minimum tubulin concentration ( $C^*$ ) needed for growth at pre-formed MT plus-ends ( $C^* = 1.4$   
69  $\mu$ M, Fig. 1E). Furthermore, the number of MTs nucleated from  $\gamma$ -TuRC increased non-linearly  
70 with tubulin concentration as opposed to the linear increase in MT's growth-speed with tubulin  
71 concentration (Fig. 1E). By measuring the number of MTs nucleated over time with varying  $\alpha\beta$ -

72 tubulin concentration (Fig. 1F), we calculated the rate of MT nucleation. The power-law  
73 dependence on tubulin concentration (Fig. 1G) yields the number of  $\alpha\beta$ -tubulin dimers,  $3.7 \pm 0.5$ ,  
74 that initiate MT assembly from  $\gamma$ -TuRC (Fig. 1G). Thus, the cooperative assembly of 3-4 tubulin  
75 subunits on  $\gamma$ -TuRC represents the most critical, rate-limiting step in MT nucleation.

76

### 77 **Efficiency of $\gamma$ -TuRC-mediated nucleation**

78 Based on the traditional, fixed, end-point assays for MT nucleation with large error margins,  $\gamma$ -  
79 TuRC was believed to be a poor nucleator<sup>14</sup>. To measure the efficiency of  $\gamma$ -TuRC-mediated MT  
80 nucleation, we compared it with spontaneous MT nucleation in our live TIRFM assay (Fig. 1H).  
81 In contrast to  $\gamma$ -TuRC-mediated nucleation, a high concentration of 14  $\mu$ M tubulin was required  
82 for spontaneous assembly of MTs, after which both the plus- and minus-ends polymerize (Fig. 1H,  
83 Fig. S1F and Movie S4). The number of MTs assembled as a function of the  $\alpha\beta$ -tubulin  
84 concentration displayed a power-law dependence with the exponent of  $8 \pm 1$  (Fig. 1I), indicating  
85 a highly cooperative process that requires 8  $\alpha\beta$ -tubulin dimers in a rate-limiting intermediate, in  
86 agreement with previous reports (Fig. 1H schematic, refs 4,8). In conclusion,  $\gamma$ -TuRC nucleates  
87 MTs significantly more efficiently (Fig. S1G), because its critical nucleus requires less than half  
88 the number of  $\alpha\beta$ -tubulin dimers compared to spontaneous assembly.

89

### 90 **Does $\gamma$ -TuRC nucleate a microtubule via the blunt plus-end model?**

91 It has been widely proposed that the  $\gamma$ -tubulin ring on  $\gamma$ -TuRC resembles the blunt plus-end of a  
92 MT formed by a ring of  $\alpha\beta$ -tubulins<sup>20,22,27</sup>. To test this proposition, we generated stabilized MT  
93 seeds with blunt ends as described recently<sup>22</sup> and observed MT assembly from  $\alpha\beta$ -tubulin dimers  
94 (Fig. 2A). At a minimum concentration of 2.45  $\mu$ M, approaching the critical concentration needed

95 for polymerization, a large proportion of pre-formed MT seeds assembled MTs immediately (Fig.  
96 S2A-B, Fig. 2A and Movie S5). The measured reaction kinetics (Fig. 2B) as a function of the  $\alpha\beta$ -  
97 tubulin concentration was used to obtain a power-law of the nucleation rate,  $1.2 \pm 0.4$  (Fig. 2C).  
98 This demonstrates that blunt MT seeds assemble tubulin dimers into a lattice in a non-cooperative  
99 manner, where a single  $\alpha\beta$ -tubulin dimer suffices to overcome the rate-limiting step resembling  
100 the polymerization of a MT. Thus, the kinetics of  $\gamma$ -TuRC-mediated MT nucleation does not  
101 resemble a blunt MT plus-end.

102

### 103 **Molecular insight into microtubule nucleation by $\gamma$ -TuRC**

104 We hypothesized that  $\gamma$ -tubulin's binding properties with  $\alpha\beta$ -tubulin at the nucleation interface  $\gamma$ -  
105 TuRC could provide insight into the mechanism of nucleation. We purified  $\gamma$ -tubulin, which  
106 assembles into higher order oligomers in physiological buffer<sup>24</sup> and strikingly, into filaments at  
107 high  $\gamma$ -tubulin concentrations (Fig. S2C). Because  $\gamma$ -tubulins have been shown to arrange laterally,  
108 as observed previously in its crystallized form<sup>28</sup>, a plus-ends outward orientation of  $\gamma$ -tubulin  
109 molecules could form a nucleation interface.

110 Surprisingly, the  $\gamma$ -tubulin oligomers efficiently nucleated MTs from  $\alpha\beta$ -tubulin subunits  
111 (Fig. 2D and Movie S6) and even more strikingly, capped MT minus-ends while allowing newly  
112 generated MT plus-ends to polymerize (Fig. 2E). This activity is similar to that of  $\gamma$ -TuRC,  
113 suggesting that lateral  $\gamma$ -tubulin arrays on the nucleation interface of  $\gamma$ -TuRC are sufficient to  
114 nucleate MTs.

115 Knowing that lateral  $\gamma$ -tubulin arrays in purified  $\gamma$ -tubulin oligomers and within  $\gamma$ -TuRC  
116 nucleate MTs, we hypothesized that the longitudinal affinity between  $\gamma$ -tubulin and  $\alpha\beta$ -tubulin at  
117 the interface of  $\gamma$ -TuRC could be critical in regulating its nucleation efficiency. Using bilayer

118 interferometry, we compared the interaction of  $\alpha\beta$ -tubulin dimers with themselves versus with  $\gamma$ -  
119 tubulin. Specific interactions between probe-bound  $\alpha\beta$ -tubulin and increasing concentrations of  
120 unlabeled  $\alpha\beta$ -tubulin were measured (Fig. 2F), which must be longitudinal based on the observed  
121 protofilaments in the  $\alpha\beta$ -tubulin sample by EM (Fig. S2D). In contrast, no significant binding  
122 between monomeric  $\gamma$ -tubulin and  $\alpha\beta$ -tubulin was detected (Fig. 2F), suggesting that the  
123 heterogenous longitudinal affinity between  $\gamma$ -tubulin and  $\alpha\beta$ -tubulin on the nucleation interface  
124 may be weaker compared to  $\alpha\beta$ -tubulin with another  $\alpha\beta$ -tubulin molecule that occurs when the  
125 MT lattice polymerizes. In sum, the difference in interaction strength is the basis for the kinetic  
126 barrier we observed with  $\gamma$ -TuRC but not with a blunt MT plus-end, which we summarize with an  
127 interface interaction model (Fig. 2G).

128         We next asked how 3-4 tubulin dimers formed the rate-limiting species during  $\gamma$ -TuRC  
129 nucleation. In stochastic simulations, the 13 available binding sites on  $\gamma$ -tubulin molecules within  
130  $\gamma$ -TuRC were allowed to be occupied at random with  $\alpha\beta$ -tubulin subunits. We then assessed how  
131 many  $\alpha\beta$ -tubulin dimers need to assemble on  $\gamma$ -TuRC to obtain two  $\alpha\beta$ -tubulin molecules on  
132 neighboring sites and form a favorable configuration with a lateral contact between the two  $\alpha\beta$ -  
133 tubulins (Fig. 2H). The simulations show that  $3.7 \pm 1$  tubulin dimers assemble on  $\gamma$ -TuRC to form  
134 the first lateral contact between two  $\alpha\beta$ -tubulins (Fig. 2H), in striking agreement with the critical  
135 nucleus size we measured. In sum, our data shows that a lateral  $\gamma$ -tubulin array positioned by  $\gamma$ -  
136 TuRC promotes MT nucleation. The low  $\gamma$ -tubulin: $\alpha\beta$ -tubulin affinity requires binding of 3-4  $\alpha\beta$ -  
137 tubulin dimers to  $\gamma$ -TuRC to form the first lateral contact between two  $\alpha\beta$ -tubulin dimers and  
138 overcome the kinetic barrier before entering the MT polymerization phase. This nucleation barrier,  
139 in turn, provides the ability to further modulate MT nucleation via other factors.

140



## 141 **Regulation of $\gamma$ -TuRC mediated nucleation by microtubule associated proteins**

142 Recent work suggested that MT-associated proteins (MAPs), which stabilize or destabilize MT  
143 plus-ends, influence MT nucleation in an analogous fashion<sup>7,22,23,27</sup>. We assessed this hypothesis  
144 for MT nucleation by  $\gamma$ -TuRC. The protein TPX2 functions as an anti-catastrophe factor *in vitro*  
145 <sup>22,23</sup> and has been suggested to directly stimulate  $\gamma$ -TuRC-mediated nucleation<sup>21,29-31</sup>. Strikingly,  
146 although TPX2 binds along the MT lattice, it does not increase nucleation activity of  $\gamma$ -TuRC (Fig.  
147 3A and Movie S7). Similarly, the catastrophe factor EB1 does not decrease the nucleation activity  
148 of  $\gamma$ -TuRC (Fig. S3A and Movie S8). Thus, in agreement with our previous results (Figs. 1 and  
149 2A-B), destabilization of MT plus-ends and a competition between  
150 polymerization/depolymerization is not sufficient to explain the properties of MT nucleation from  
151  $\gamma$ -TuRC. Not surprisingly, decreasing the net rate of incorporation of tubulin into a MT using  
152 Stathmin, which sequesters tubulin dimers<sup>32,33</sup>, or MCAK, which removes tubulin dimers from the  
153 MT lattice and prevents polymerization<sup>34,35</sup>, decreased the number of MTs generated from  $\gamma$ -TuRC  
154 (Fig. S3B).

155

## 156 **How do $\gamma$ -TuRC and XMAP215 synergistically nucleate microtubules?**

157 At low tubulin concentration of 3.5  $\mu$ M and 7  $\mu$ M, where either none or very little MT nucleation  
158 occurs from  $\gamma$ -TuRCs alone respectively, the addition of XMAP215 induced many surface-  
159 attached  $\gamma$ -TuRCs to nucleate MTs resulting in significant increase in MT nucleation rate (Fig. 3B-  
160 C and Movie S9). XMAP215 effectively decreases the minimal tubulin concentration necessary  
161 for MT nucleation from  $\gamma$ -TuRC to 1.6  $\mu$ M, which is very close to that needed for plus-end  
162 polymerization. What is the sequence of events that leads to synergistic MT nucleation? By  
163 directly visualizing  $\gamma$ -TuRC and XMAP215 molecules during the nucleation reaction, we found

164 that XMAP215 and  $\gamma$ -TuRC molecules first formed a complex from which a MT was nucleated  
165 (Fig. 3D and Movie S11). For 76% of the events (n=56), XMAP215 visibly persisted between 3  
166 to over 300 seconds on  $\gamma$ -TuRC before MT nucleation, and with a 50% probability XMAP215  
167 remained on the minus-end together with  $\gamma$ -TuRC (n=58).

168         Could XMAP215 accelerate nucleation by altering the critical tubulin nucleus that  
169 assembles during  $\gamma$ -TuRC-mediated nucleation? Titrating tubulin at constant  $\gamma$ -TuRC and  
170 XMAP215 concentrations (Fig. S4A and Movies S10) yielded a similar power-law dependence  
171 between the MT nucleation rate and tubulin concentration (Fig. 3E). The resulting critical nucleus  
172 size of  $3.2 \pm 1.2$  is very similar to that for  $\gamma$ -TuRC alone (Fig. 3E). Moreover, the C-terminus of  
173 XMAP215 (TOG5 and C-terminal domain), which directly interacts with  $\gamma$ -tubulin but not with  
174  $\alpha\beta$ -tubulin<sup>24</sup>, does not enhance MT nucleation from  $\gamma$ -TuRC (Fig. S4B). Altogether,  $\gamma$ -TuRC  
175 determines the critical nucleus of  $\alpha\beta$ -tubulin dimers for MT nucleation (Fig. 2H). XMAP215,  
176 which directly binds to  $\gamma$ -tubulin via its C-terminal domain, does not appear to activate  $\gamma$ -TuRC  
177 via a conformational change, but likely relies on N-terminal TOG domains to increase  $\alpha\beta$ -tubulin  
178 incorporation by effectively increasing the local  $\alpha\beta$ -tubulin concentration, and thereby promoting  
179 MT nucleation.

180

## 181 **Discussion**

182 Decades after the discovery of  $\alpha\beta$ -tubulin and MTs and the identification of  $\gamma$ -TuRC as the  
183 universal MT nucleator<sup>17-19</sup>, it has remained poorly understood how MTs are being nucleated<sup>7,20,21</sup>.  
184 Here, we show that  $\gamma$ -TuRC-mediated MT nucleation is more efficient than spontaneous MT  
185 assembly, requiring fewer tubulin dimers to form the rate-limiting reaction intermediate. This  
186 explains why MTs do not form spontaneously in the cell and why  $\gamma$ -TuRC is essential, addressing  
187 a long debate on  $\gamma$ -TuRC's MT nucleation activity and requirement<sup>36-38</sup>. Spontaneous MT  
188 assembly requires higher tubulin concentrations and occurs due to stronger longitudinally-  
189 interacting  $\alpha\beta/\alpha\beta$ -tubulin and weaker lateral interactions. In contrast,  $\gamma$ -TuRC-mediated  
190 nucleation, driven by the lateral adjacency of the  $\gamma$ -tubulins on the nucleation interface, is sufficient  
191 to overcome the intrinsically very weak  $\alpha\beta$ -tubulin lateral interaction, thereby potentiating MT  
192 nucleation. Thus, we propose that, in metazoans analogous to the *S. cerevisiae*  $\gamma$ -TuSC rings<sup>15,16</sup>,  
193 GCPs within  $\gamma$ -TuRC restrict the number of laterally-arranged  $\gamma$ -tubulin subunits, and position  
194 them in the right geometry to template 13-pf MTs. Finally, our results show that 3-4  $\alpha\beta$ -tubulin  
195 form the critical nucleus on  $\gamma$ -TuRC, not 1 or 13 which would have been expected from previous  
196 mechanistic hypotheses<sup>20</sup>. We find that on average 3-4  $\alpha\beta$ -tubulin dimers assemble on  $\gamma$ -TuRC to  
197 form the first lateral  $\alpha\beta$ -/ $\alpha\beta$ -tubulin contact and overcome the kinetic barrier that results from low  
198 longitudinal affinity between  $\gamma$ -: $\alpha\beta$ -tubulin on  $\gamma$ -TuRC. However, alternative reaction  
199 intermediates during nucleation from  $\gamma$ -TuRC may exist. In the future, it will be important to  
200 visualize the nucleation intermediates on  $\gamma$ -TuRC, develop molecular simulations with  
201 experimentally derived affinities at various interaction interfaces and evaluate whether additional  
202 effects from tubulin straightening play a significant role in MT nucleation in the cell.

203           The intermediate level of MT nucleation efficiency afforded by  $\gamma$ -TuRC allows other  
204 factors to further modulate its efficiency. As such, XMAP215 accelerates MT nucleation from  $\gamma$ -  
205 TuRC, while not altering the geometry of the  $\alpha\beta$ -tubulin nucleus on  $\gamma$ -TuRC or directly activating  
206  $\gamma$ -TuRC. Future studies will be necessary to define the modes by which XMAP215 contributes to  
207  $\gamma$ -TuRC-mediated MT nucleation, such as increasing the probability of the  $\gamma/\alpha\beta$ -tubulin interaction  
208 or promoting straightening of incoming tubulin dimers. Our findings suggest that influencing  $\gamma/\alpha\beta$ -  
209 tubulin interaction favorably or unfavorably may underlie a dominant mechanism for regulating  
210 nucleation in the cell by other, yet unidentified nucleation factors. Additionally,  $\gamma$ -TuRC's activity  
211 is further regulated via accessory proteins such as CDK5RAP2, and NME7<sup>2,20,39,40</sup>. While the  
212 mechanisms of these additional regulation layers are yet to be defined, the insights on MT  
213 nucleation by  $\gamma$ -TuRC and XMAP215 provide an essential basis to build upon. Finally, this work  
214 opens the door to reconstitute cellular structures *in vitro* using MT nucleation from  $\gamma$ -  
215 TuRC/XMAP215 to further our understanding of how the cytoskeleton is generated to support cell  
216 function.

217 **Supplementary Information**

218 Supplementary Information includes four figures and ten videos.

219

220 **Acknowledgements**

221 We thank David Agard, Tim Mitchison, Michelle Moritz and Petry lab members for discussions.

222 This work was supported by an American Heart Association predoctoral fellowship

223 17PRE33660328 and a Princeton University Honorific Fellowship (both to AT), the NIH New

224 Innovator Award 1DP2GM123493, Pew Scholars Program in the Biomedical Sciences 00027340,

225 David and Lucile Packard Foundation 2014-40376 (all to SP), and the Center for the Physics of

226 Biological Function sponsored by the National Science Foundation grant PHY-1734030.

227

228 **Author contributions**

229 A.T. designed and performed research, analyzed the data and wrote the manuscript. S.P., J.W.S.

230 and H.A.S. supervised research and wrote the manuscript.

231

232 **Competing financial interests**

233 The authors declare no competing financial interests.

234

235 **Abbreviations List**

236 Microtubule (MT)

237 Microtubule associated protein (MAP)

238 Gamma-tubulin ( $\gamma$ -tubulin) and Gamma-tubulin ring complex ( $\gamma$ -TuRC)

239 Gamma-tubulin complex protein (GCP)

240 Protofilament (pf)

241 Electron microscopy (EM)

242 **References**

- 243 1. Brugués, J., Nuzzo, V., Mazur, E. & Needleman, D. J. Nucleation and transport organize  
244 microtubules in metaphase spindles. *Cell* **149**, 554–564 (2012).
- 245 2. Petry, S. & Vale, R. D. Microtubule nucleation at the centrosome and beyond. *Nat. Cell Biol.*  
246 **17**, 1089–1093 (2015).
- 247 3. Wu, J. & Akhmanova, A. Microtubule-Organizing Centers. *Annu. Rev. Cell Dev. Biol.* **33**, 51–  
248 75 (2017).
- 249 4. Voter, W. A. & Erickson, H. P. The kinetics of microtubule assembly. Evidence for a two-  
250 stage nucleation mechanism. *J. Biol. Chem.* **259**, 10430–10438 (1984).
- 251 5. Portran, D., Schaedel, L., Xu, Z., Théry, M. & Nachury, M. V. Tubulin acetylation protects  
252 long-lived microtubules against mechanical ageing. *Nat. Cell Biol.* **19**, 391–398 (2017).
- 253 6. Rice, L., Moritz, M. & Agard, D. A. *Microtubules form by progressively faster tubulin*  
254 *accretion, not by nucleation-elongation.* <http://biorxiv.org/lookup/doi/10.1101/545236>  
255 (2019) doi:10.1101/545236.
- 256 7. Roostalu, J. & Surrey, T. Microtubule nucleation: beyond the template. *Nat. Rev. Mol. Cell*  
257 *Biol.* **18**, 702–710 (2017).
- 258 8. Flyvbjerg, H., Jobs, E. & Leibler, S. Kinetics of self-assembling microtubules: an ‘inverse  
259 problem’ in biochemistry. *Proc. Natl. Acad. Sci. U.S.A.* **93**, 5975–5979 (1996).
- 260 9. Hannak, E. *et al.* The kinetically dominant assembly pathway for centrosomal asters in  
261 *Caenorhabditis elegans* is gamma-tubulin dependent. *J. Cell Biol.* **157**, 591–602 (2002).
- 262 10. Groen, A. C., Maresca, T. J., Gatlin, J. C., Salmon, E. D. & Mitchison, T. J. Functional  
263 overlap of microtubule assembly factors in chromatin-promoted spindle assembly. *Mol. Biol.*  
264 *Cell* **20**, 2766–2773 (2009).

- 265 11. Oakley, C. E. & Oakley, B. R. Identification of gamma-tubulin, a new member of the tubulin  
266 superfamily encoded by mipA gene of *Aspergillus nidulans*. *Nature* **338**, 662–664 (1989).
- 267 12. Moritz, M., Braunfeld, M. B., Sedat, J. W., Alberts, B. & Agard, D. A. Microtubule  
268 nucleation by gamma-tubulin-containing rings in the centrosome. *Nature* **378**, 638–640  
269 (1995).
- 270 13. Moritz, M., Zheng, Y., Alberts, B. M. & Oegema, K. Recruitment of the gamma-tubulin ring  
271 complex to *Drosophila* salt-stripped centrosome scaffolds. *J. Cell Biol.* **142**, 775–786 (1998).
- 272 14. Zheng, Y., Wong, M. L., Alberts, B. & Mitchison, T. Nucleation of microtubule assembly by  
273 a gamma-tubulin-containing ring complex. *Nature* **378**, 578–583 (1995).
- 274 15. Kollman, J. M., Polka, J. K., Zelter, A., Davis, T. N. & Agard, D. A. Microtubule nucleating  
275 gamma-TuSC assembles structures with 13-fold microtubule-like symmetry. *Nature* **466**,  
276 879–882 (2010).
- 277 16. Kollman, J. M. *et al.* Ring closure activates yeast  $\gamma$ TuRC for species-specific microtubule  
278 nucleation. *Nat. Struct. Mol. Biol.* **22**, 132–137 (2015).
- 279 17. Moritz, M., Braunfeld, M. B., Guénebaut, V., Heuser, J. & Agard, D. A. Structure of the  
280 gamma-tubulin ring complex: a template for microtubule nucleation. *Nat. Cell Biol.* **2**, 365–  
281 370 (2000).
- 282 18. Keating, T. J. & Borisy, G. G. Immunostuctural evidence for the template mechanism of  
283 microtubule nucleation. *Nat. Cell Biol.* **2**, 352–357 (2000).
- 284 19. Wiese, C. & Zheng, Y. A new function for the gamma-tubulin ring complex as a microtubule  
285 minus-end cap. *Nat. Cell Biol.* **2**, 358–364 (2000).
- 286 20. Kollman, J. M., Merdes, A., Mourey, L. & Agard, D. A. Microtubule nucleation by  $\gamma$ -tubulin  
287 complexes. *Nat. Rev. Mol. Cell Biol.* **12**, 709–721 (2011).



- 288 21. Tovey, C. A. & Conduit, P. T. Microtubule nucleation by  $\gamma$ -tubulin complexes and beyond.  
289 *Essays Biochem.* **62**, 765–780 (2018).
- 290 22. Wieczorek, M., Bechstedt, S., Chaaban, S. & Brouhard, G. J. Microtubule-associated  
291 proteins control the kinetics of microtubule nucleation. *Nat. Cell Biol.* **17**, 907–916 (2015).
- 292 23. Roostalu, J., Cade, N. I. & Surrey, T. Complementary activities of TPX2 and chTOG  
293 constitute an efficient importin-regulated microtubule nucleation module. *Nat. Cell Biol.* **17**,  
294 1422–1434 (2015).
- 295 24. Thawani, A., Kadzik, R. S. & Petry, S. XMAP215 is a microtubule nucleation factor that  
296 functions synergistically with the  $\gamma$ -tubulin ring complex. *Nat. Cell Biol.* **20**, 575–585  
297 (2018).
- 298 25. Flor-Parra, I., Iglesias-Romero, A. B. & Chang, F. The XMAP215 Ortholog Alp14 Promotes  
299 Microtubule Nucleation in Fission Yeast. *Curr. Biol.* **28**, 1681-1691.e4 (2018).
- 300 26. Gunzelmann, J. *et al.* The microtubule polymerase Stu2 promotes oligomerization of the  $\gamma$ -  
301 TuSC for cytoplasmic microtubule nucleation. *Elife* **7**, (2018).
- 302 27. Brouhard, G. J. & Rice, L. M. Microtubule dynamics: an interplay of biochemistry and  
303 mechanics. *Nat. Rev. Mol. Cell Biol.* **19**, 451–463 (2018).
- 304 28. Aldaz, H., Rice, L. M., Stearns, T. & Agard, D. A. Insights into microtubule nucleation from  
305 the crystal structure of human gamma-tubulin. *Nature* **435**, 523–527 (2005).
- 306 29. Alfaro-Aco, R., Thawani, A. & Petry, S. Structural analysis of the role of TPX2 in branching  
307 microtubule nucleation. *J. Cell Biol.* **216**, 983–997 (2017).
- 308 30. Zhang, R., Roostalu, J., Surrey, T. & Nogales, E. Structural insight into TPX2-stimulated  
309 microtubule assembly. *Elife* **6**, (2017).

- 310 31. Wiese, C. & Zheng, Y. Microtubule nucleation: gamma-tubulin and beyond. *J. Cell. Sci.*  
311 **119**, 4143–4153 (2006).
- 312 32. Jourdain, L., Curmi, P., Sobel, A., Pantaloni, D. & Carlier, M. F. Stathmin: a tubulin-  
313 sequestering protein which forms a ternary T2S complex with two tubulin molecules.  
314 *Biochemistry* **36**, 10817–10821 (1997).
- 315 33. Belmont, L. D. & Mitchison, T. J. Identification of a protein that interacts with tubulin  
316 dimers and increases the catastrophe rate of microtubules. *Cell* **84**, 623–631 (1996).
- 317 34. Howard, J. & Hyman, A. A. Microtubule polymerases and depolymerases. *Curr. Opin. Cell*  
318 *Biol.* **19**, 31–35 (2007).
- 319 35. Hunter, A. W. *et al.* The kinesin-related protein MCAK is a microtubule depolymerase that  
320 forms an ATP-hydrolyzing complex at microtubule ends. *Mol. Cell* **11**, 445–457 (2003).
- 321 36. Rogers, G. C., Rusan, N. M., Peifer, M. & Rogers, S. L. A multicomponent assembly  
322 pathway contributes to the formation of acentrosomal microtubule arrays in interphase  
323 *Drosophila* cells. *Mol. Biol. Cell* **19**, 3163–3178 (2008).
- 324 37. Raff, J. W. Phase Separation and the Centrosome: A Fait Accompli? *Trends Cell Biol.* **29**,  
325 612–622 (2019).
- 326 38. Woodruff, J. B. *et al.* The Centrosome Is a Selective Condensate that Nucleates Microtubules  
327 by Concentrating Tubulin. *Cell* **169**, 1066–1077.e10 (2017).
- 328 39. Choi, Y.-K., Liu, P., Sze, S. K., Dai, C. & Qi, R. Z. CDK5RAP2 stimulates microtubule  
329 nucleation by the gamma-tubulin ring complex. *J. Cell Biol.* **191**, 1089–1095 (2010).
- 330 40. Liu, P., Choi, Y.-K. & Qi, R. Z. NME7 is a functional component of the  $\gamma$ -tubulin ring  
331 complex. *Mol. Biol. Cell* **25**, 2017–2025 (2014).

- 332 41. Petry, S., Pugieux, C., Nédélec, F. J. & Vale, R. D. Augmin promotes meiotic spindle  
333 formation and bipolarity in *Xenopus* egg extracts. *Proc. Natl. Acad. Sci. U.S.A.* **108**, 14473–  
334 14478 (2011).
- 335 42. Tan, S., Kern, R. C. & Selleck, W. The pST44 polycistronic expression system for producing  
336 protein complexes in *Escherichia coli*. *Protein Expr. Purif.* **40**, 385–395 (2005).
- 337 43. Ohi, R., Sapra, T., Howard, J. & Mitchison, T. J. Differentiation of cytoplasmic and meiotic  
338 spindle assembly MCAK functions by Aurora B-dependent phosphorylation. *Mol. Biol. Cell*  
339 **15**, 2895–2906 (2004).
- 340 44. Reber, S. B. *et al.* XMAP215 activity sets spindle length by controlling the total mass of  
341 spindle microtubules. *Nat. Cell Biol.* **15**, 1116–1122 (2013).
- 342 45. Hannak, E. & Heald, R. Investigating mitotic spindle assembly and function in vitro using  
343 *Xenopus laevis* egg extracts. *Nat Protoc* **1**, 2305–2314 (2006).
- 344 46. Murray, A. W. & Kirschner, M. W. Cyclin synthesis drives the early embryonic cell cycle.  
345 *Nature* **339**, 275–280 (1989).
- 346 47. Bieling, P., Telley, I. A., Hentrich, C., Piehler, J. & Surrey, T. Fluorescence microscopy  
347 assays on chemically functionalized surfaces for quantitative imaging of microtubule, motor,  
348 and +TIP dynamics. *Methods Cell Biol.* **95**, 555–580 (2010).

349

350 **Methods**

351

352 **Purification of recombinant proteins**

353 C-terminal GFP was replaced with mCherry tag in the pET21a vector carrying EB1<sup>41</sup>. Full-length  
354 TPX2 with N-terminal Strep II-6xHis-GFP-TEV site tags was cloned into pST50Tr-  
355 STRHISNDHFR (pST50) vector<sup>42</sup> using Gibson Assembly (New England Biolabs). N-terminal  
356 6xHis-tagged, *Xenopus laevis* Stathmin 1A was a gift from Christiane Wiese (University of  
357 Madison). N-terminal tagged 6xHis-TEV MCAK plasmid was a gift from Ryoma Ohi<sup>43</sup>. Wild-  
358 type XMAP215 with C-terminal GFP-7xHis plasmid was a gift from Simone Reber<sup>44</sup> and was used  
359 to clone XMAP215 with C-terminal SNAP-TEV-7xHis-StrepII tags, first into pST50 vector and  
360 further into pFastBac1 vector. TOG5-CT truncation of XMAP215 was produced by cloning amino  
361 acids 1091-2065 into pST50 vector with C-terminal GFP-7xHis-Strep tags. Human  $\gamma$ -tubulin TEV-  
362 Strep II-6xHis tags was codon-optimized for Sf9 expression, synthesized (Genscript), and further  
363 cloned into pFastBac1 vector.

364 EB1, TPX2, Stathmin and XMAP215 TOG5-CT used in this study were expressed in *E.*  
365 *coli* Rosetta2 cells (EMD Millipore) by inducing with 0.5-1 mM IPTG for 12-18 hours at 16°C or  
366 7 hours at 25°C. Wild-type XMAP215, MCAK and  $\gamma$ -tubulin were expressed and purified from  
367 Sf9 cells using Bac-to-Bac system (Invitrogen). The cells were lysed (EmulsiFlex, Avestin) and  
368 *E. coli* lysate was clarified by centrifugation at 13,000 rpm in Fiberlite F21-8 rotor (ThermoFisher)  
369 and Sf9 cell lysate at 50,000 rpm in Ti70 rotor (Beckman Coulter) for 30-45 minutes.

370 EB1 and Stathmin were purified using His-affinity (His-Trap HP, GE Healthcare) by first  
371 binding in binding buffer (20mM NaPO<sub>4</sub> pH 8.0, 500mM NaCl, 30mM Imidazole, 2.5mM PMSF,  
372 6mM BME) and eluting with 300mM Imidazole, followed by gel filtration (HiLoad 16/600

373 Superdex, GE Healthcare) into CSF-XB buffer (100mM KCl, 10mM K-HEPES, 5mM K-EGTA,  
374 1mM MgCl<sub>2</sub>, 0.1mM CaCl<sub>2</sub>, pH 7.7 with 10% w/v sucrose).

375 TPX2 was first affinity purified using Ni-NTA beads in binding buffer (50mM Tris-HCl  
376 pH 8.0, 750mM NaCl, 15mM Imidazole, 2.5mM PMSF, 6mM BME) and eluted with 200mM  
377 Imidazole. All protein was pooled and diluted 4-fold to 200mM final NaCl. Nucleotides were  
378 removed with a Heparin column (HiTrap Heparin HP, GE Healthcare) by binding protein in  
379 250mM NaCl and isocratic elution in 750mM NaCl, all solutions prepared in Heparin buffer  
380 (50mM Tris-HCl, pH 8.0, 2.5mM PMSF, 6mM BME). Peak fractions were pooled and loaded on  
381 to Superdex 200 pg 16/600, and gel filtration was performed in CSF-XB buffer.

382 MCAK was first affinity purified by binding to His-Trap HP (GE Healthcare) in binding  
383 buffer (50mM NaPO<sub>4</sub>, 500mM NaCl, 6mM BME, 0.1mM MgATP, 10mM Imidazole, 1mM  
384 MgCl<sub>2</sub>, 2.5mM PMSF, 6mM BME, pH to 7.5), eluting with 300mM Imidazole, followed by gel-  
385 filtration (Superdex 200 10/300 GL, GE Healthcare) in storage buffer (10 mM K-HEPES pH 7.7,  
386 300 mM KCl, 6mM BME, 0.1 mM MgATP, 1mM MgCl<sub>2</sub>, 10% w/v sucrose).

387 XMAP215-GFP was purified using His-affinity (His-Trap, GE Healthcare) by binding in  
388 buffer (50mM NaPO<sub>4</sub>, 500mM NaCl, 20mM Imidazole, pH 8.0) and eluting in 500mM Imidazole.  
389 Peak fractions were pooled and diluted 5-fold with 50mM Na-MES pH 6.6, bound to a cation-  
390 exchange column (Mono S 10/100 GL, GE Healthcare) with 50mM MES, 50mM NaCl, pH 6.6  
391 and eluted with a salt-gradient up to 1M NaCl. Peak fractions were pooled and dialyzed into CSF-  
392 XB buffer. SNAP-tagged XMAP215 was first affinity purified with StrepTrap HP (GE Healthcare)  
393 with binding buffer (50mM NaPO<sub>4</sub>, 270mM NaCl, 2mM MgCl<sub>2</sub>, 2.5mM PMSF, 6mM BME, pH  
394 7.2), eluted with 2.5mM D-desthiobiotin, and cation-exchanged (Mono S 10/100 GL). Peak  
395 fractions were pooled, concentrated and reacted with 2-molar excess SNAP-substrate Alexa-488

396 dye (S9129, NEB) overnight at 4°C, followed by purification via gel filtration (Superdex 200  
397 10/300 GL) in CSF-XB buffer. Approximately 70% labeling efficiency of the SNAP-tag was  
398 achieved.

399  $\gamma$ -tubulin was purified by binding to HisTrap HP (GE Healthcare) in binding buffer (50  
400 mM KPO<sub>4</sub> pH 8.0, 500 mM KCl, 1 mM MgCl<sub>2</sub>, 10% glycerol, 5mM Imidazole, 0.25  $\mu$ M GTP, 5  
401 mM BME, 2.5mM PMSF), washing first with 50 mM KPO<sub>4</sub> pH 8.0, 300 mM KCl, 1 mM MgCl<sub>2</sub>,  
402 10% glycerol, 25 mM imidazole, 0.25  $\mu$ M GTP, 5 mM BME), and then with 50 mM K-MES pH  
403 6.6, 500 mM KCl, 5mM MgCl<sub>2</sub>, 10% glycerol, 25 mM imidazole, 0.25  $\mu$ M GTP, 5 mM BME) and  
404 eluted in 50 mM K-MES pH 6.6, 500 mM KCl, 5mM MgCl<sub>2</sub>, 10% glycerol, 250 mM imidazole,  
405 0.25  $\mu$ M GTP, 5 mM BME. Peak fractions were further purified with gel filtration (Superdex 200  
406 10/300 GL) in buffer 50 mM K-MES pH 6.6, 500 mM KCl, 5 mM MgCl<sub>2</sub>, 1 mM K-EGTA, 1  $\mu$ M  
407 GTP, 1 mM DTT.

408 All proteins were flash-frozen and stored at -80°C, and their concentration was determined  
409 by analyzing a Coomassie-stained SDS-PAGE against known concentration of BSA (A7906,  
410 Sigma).

411

#### 412 **Purification, biotinylated and fluorescent labeling of $\gamma$ -TuRC**

413 Endogenous  $\gamma$ -TuRC was purified from *Xenopus* egg extracts and labeled with the following steps  
414 at 4°C. 7-8 ml of meiotic extract from *Xenopus laevis* eggs, prepared as described previously<sup>45,46</sup>,  
415 was first diluted 5-fold with CSF-XBg buffer (10mM K-HEPES, 100mM KCl, 1mM MgCl<sub>2</sub>, 5mM  
416 K-EGTA, 10% w/v sucrose, 1mM DTT, 1mM GTP, 10  $\mu$ g/ml LPC protease inhibitors, pH 7.7),  
417 centrifuged to remove large aggregates at 3500 rpm (Thermo Sorvall Legend XTR) for 10 minutes,  
418 and the supernatant filtered sequentially with 1.2  $\mu$ m and 0.8  $\mu$ m Cellulose Acetate filters

419 (Whatman) followed by 0.22  $\mu\text{m}$  PES filter (ThermoFisher).  $\gamma$ -TuRC was precipitated by  
420 incubating with 6.5% w/v PEG-8000k (Sigma) for 30 minutes and centrifuged at 17,000 rpm (SS-  
421 34 rotor, ThermoScientific) for 20 minutes.  $\gamma$ -TuRC-rich pellet was resuspended in CSF-XB buffer  
422 with 0.05% v/v NP-40 using a mortar & pestle homogenizer, PEG was removed via centrifugation  
423 at 136,000  $\times g$  for 7 minutes in TLA100.3 (Beckman Ultracentrifuge), and supernatant was pre-  
424 cleared by incubating with Protein A Sepharose beads (GE LifeSciences #17127901) for 20  
425 minutes. Beads were removed,  $\gamma$ -TuRC was incubated with 4-5 mg of a polyclonal antibody  
426 custom-made against C-terminal residues 413-451 of *X. laevis*  $\gamma$ -tubulin (Genscript) for 2 hours  
427 on gentle rotisserie, and further incubated with 1ml washed Protein A Sepharose bead slurry for 2  
428 hours.  $\gamma$ -TuRC-bound beads were washed sequentially with 30 ml of CSF-XBg buffer, 30 ml of  
429 CSF-XBg buffer with 250 mM KCl (high salt wash), 10 ml CSF-XBg buffer with 5mM ATP  
430 (removes heat-shock proteins), and finally 10 ml CSF-XBg buffer before labeling. For  
431 biotinylation of  $\gamma$ -TuRC, beads were incubated with 25  $\mu\text{M}$  NHS-PEG4-biotin (A39259,  
432 ThermoFisher) in CSF-XBg buffer for 1 hour at 4°C, and unbound biotin was removed by washing  
433 with 30 ml CSF-XBg buffer prior to elution step. For combined fluorescent and biotin labeling of  
434  $\gamma$ -TuRC, the wash step after ATP-wash consisted of 10 ml of labelling buffer (10mM K-HEPES,  
435 100mM KCl, 1mM MgCl<sub>2</sub>, 5mM K-EGTA, 10% w/v sucrose, 0.5mM TCEP, 1mM GTP, 10  $\mu\text{g}/\text{ml}$   
436 LPC, pH 7.2) and fluorescent labelling was performed by incubating the beads with 1  $\mu\text{M}$  Alexa-  
437 568 C<sub>5</sub> Maleimide (A20341, ThermoFisher). Unreacted dye was removed with 10 ml CSF-XBg  
438 buffer, beads were incubated with 25  $\mu\text{M}$  NHS-PEG4-biotin (A39259, ThermoFisher) in CSF-  
439 XBg buffer for 1 hour at 4°C, and unreacted biotin removed with 30 ml CSF-XBg buffer. Labeled  
440  $\gamma$ -TuRC was eluted by incubating 2-3ml of  $\gamma$ -tubulin peptide (residues 413-451) at 0.4mg/ml in  
441 CSF-XBg buffer with beads overnight. After 10-12 hours,  $\gamma$ -TuRC was collected by adding 1-2ml

442 CSF-XBg buffer to the column, concentrated to 200  $\mu$ l in 30k NMWL Amicon concentrator (EMD  
443 Millipore) and layered onto a continuous 10-50 w/w % sucrose gradient prepared in a 2.2 ml ultra-  
444 clear tube (11x34 mm, Beckman Coulter) using a two-step program in Gradient Master 108  
445 machine. Sucrose gradient fractionation of  $\gamma$ -TuRC was performed by centrifugation at 200,000xg  
446 in TLS55 rotor (Beckman Coulter) for 3 hours. The gradient was fractionated from the top in 11-  
447 12 fractions using wide-bore pipette tips and peak 2-3 fractions were identified by immunoblotting  
448 against  $\gamma$ -tubulin with GTU-88 antibody (Sigma).  $\gamma$ -TuRC was concentrated to 80  $\mu$ l in 30k  
449 NMWL Amicon concentrator (EMD Millipore) and fresh purification was used immediately for  
450 single molecule assays. Cryo-preservation of  $\gamma$ -TuRC molecules resulted in loss of ring assembly  
451 and activity.

452

#### 453 **Assessment of $\gamma$ -TuRC with protein gel, immunoblot and negative stain electron microscopy**

454 To assess the purity of  $\gamma$ -TuRC, 3-5  $\mu$ l of purified  $\gamma$ -TuRC was visualized on an SDS-PAGE with  
455 SYPRO Ruby stain (ThermoFisher) following the manufacturer's protocol. Biotinylated subunits  
456 of  $\gamma$ -TuRC were assessed by immunoblotting with Streptavidin-conjugated alkaline phosphatase  
457 (S921, ThermoFisher).  $\gamma$ -TuRC purification was also assessed by visualizing using electron  
458 microscopy. 4  $\mu$ l of peak sucrose gradient fraction of  $\gamma$ -TuRC was pipetted onto CF400-Cu grids  
459 (Electron Microscopy Sciences), incubated at room temperature for 60 seconds and then wicked  
460 away. 2% uranyl acetate was applied to the grids for 30 seconds, wicked away, and the grids were  
461 air-dried for 10 minutes. The grids were imaged using Phillips CM100 TEM microscope at 64000x  
462 magnification.

463

#### 464 **Preparation of functionalized coverslips**



465 22x22 mm, high precision coverslips ( $170\pm 5$   $\mu\text{m}$ , Carl Zeiss, catalog # 474030-9020-000) were  
466 functionalized for single molecule assays based on a recent protocol<sup>23,47</sup> with specific  
467 modifications. Briefly, coverslips were labelled on the surface to be functionalized by scratching  
468 “C” on right, bottom corner, placed in Teflon racks, sonicated with 3N NaOH for 30 minutes,  
469 rinsed with water and sonicated in piranha solution (2 parts of 30 w/w % hydrogen peroxide and  
470 3 parts sulfuric acid) for 45 minutes. Coverslips were rinsed thrice in water, and all water was  
471 removed by spin drying completely in a custom-made spin coater. Pairs of coverslips were made  
472 to sandwich 3-glycidyloxypropyl trimethoxysilane (440167, Sigma) on the marked sides, placed  
473 in glass petri dishes, and covalent reaction was performed in a lab oven at 75°C for 30 minutes.  
474 Coverslips were incubated for 15 minutes at room temperature, the sandwiches were separated,  
475 incubated in acetone for 15 minutes, then transferred to fresh acetone and quickly dried under  
476 nitrogen stream. Coverslip sandwiches were prepared with a small pile of well mixed HO-PEG-  
477 NH<sub>2</sub> and 10% biotin-CONH-PEG-NH<sub>2</sub> (Rapp Polymere) in glass petri dishes, warmed to 75°C in  
478 the lab oven until PEG melts, air bubbles were pressed out and PEG coupling was performed at  
479 75°C overnight. The following day, individual coverslips were separated from sandwiches,  
480 sonicated in MilliQ water for 30 minutes, washed further with water until no foaming is visible,  
481 dried with a spin dryer, and stored at 4°C. Functionalized coverslips were used within 1 month of  
482 preparation.

483         Imaging chambers were prepared by first assembling a channel on glass slide with double  
484 sided tape strips (Tesa) 5 mm apart, coating the channel with 2mg/ml PLL(20)-g[3.5]- PEG(2)  
485 (SuSOS) in dH<sub>2</sub>O, incubating for 20 minutes, rinsing out the unbound PEG molecules with dH<sub>2</sub>O  
486 and drying the glass slide under the nitrogen stream. A piece of functionalized coverslip was cut

487 with the diamond pen and assembled functionalized face down on imaging chamber. The prepared  
488 chambers were stored at 4°C and used within a day of assembly.

489

#### 490 **Microtubule nucleation assay with purified $\gamma$ -TuRC, microscopy and data analysis**

491 The imaging channel was prepared as follows. First, 5% w/v Pluronic F-127 in dH<sub>2</sub>O was  
492 introduced in the chamber (1 vol = 50  $\mu$ l) and incubated for 10 minutes at room temperature. The  
493 chamber was washed with 2 vols of assay buffer (80mM K-PIPES, 1mM MgCl<sub>2</sub>, 1mM EGTA,  
494 30mM KCl, 0.075% w/v methylcellulose 4000 cp, 1% w/v D-(+)-glucose, 0.02% w/v Brij-35,  
495 5mM BME, 1mM GTP) with 0.05 mg/ml  $\kappa$ -casein (casein buffer), followed by 1 vol of 0.5 mg/ml  
496 NeutrAvidin (A2666, ThermoFisher) in casein buffer, incubated on a cold block for 3 minutes,  
497 and washed with 2 vols of BRB80 (80mM K-PIPES, 1mM MgCl<sub>2</sub>, 1mM EGTA pH 6.8). 5-fold  
498 dilution of  $\gamma$ -TuRC in BRB80 was introduced in the flow chamber and incubated for 10 minutes.  
499 Unattached  $\gamma$ -TuRC molecules were washed with 1 vol of BRB80.

500 During the incubations, nucleation mix was prepared containing desired concentration of  
501  $\alpha\beta$ -tubulin (3.5-21  $\mu$ M) purified from bovine brain with 5% Cy5-labeled tubulin along with  
502 1mg/ml BSA (A7906, Sigma) in assay buffer, centrifuged for 12 minutes in TLA100 (Beckman  
503 Coulter) to remove aggregates, a final 0.68 mg/ml glucose oxidase (SERVA, catalog # SE22778),  
504 0.16 mg/ml catalase (Sigma, catalog # SRE0041) was added, and reaction mixture was introduced  
505 into the flow chamber containing  $\gamma$ -TuRC.

506

507 **Total internal reflection fluorescence (TIRF) microscopy and analysis of microtubule**  
508 **nucleation from  $\gamma$ -TuRC**

509 Nucleation of MTs was visualized with inverted Nikon TiE TIRF microscope using a 100X, 1.49  
510 NA TIRF objective. An objective heater collar was attached (Bioptechs, model 150819-13) and  
511 the temperature set-point of 33.5°C was used for experiments. Time-lapse videos were recorded  
512 for 10 minutes at 0.5-1 frame per second using Andor iXon DU-897 camera with EM gain of 300  
513 and exposure time of 50-200 ms each frame. Reference time-point zero (0 seconds) refers to when  
514 the reaction was incubated at 33.5°C on the microscope, and for most reactions, imaging was  
515 started within 30 seconds.

516 Growth speed of the plus-ends of MTs nucleated by  $\gamma$ -TuRC was measured by generating  
517 kymographs in ImageJ. Region of interest (ROI) for individual MTs were selected and resliced to  
518 generate length-time plot, a line was fit to the growing MT, the slope of line represents growth  
519 speed. The kinetics of MT nucleation from  $\gamma$ -TuRC was measured as follows. A kymograph was  
520 generated for every MT nucleated in the field of view. For most nucleation events, the time of  
521 nucleation of the MT was obtained from observing the kymograph and manually recording the  
522 initiation time point (see Fig. 1C for examples). For MTs where nucleation occurred before the  
523 timelapse movie began or where the initiation was not clearly observed in the kymograph, the  
524 shortest length of the MT that was clearly visible in the timelapse was measured and measured  
525 average growth speed of MTs was used to estimate the time of nucleation. We verified that this  
526 procedure accurately estimates the nucleation time for test case MTs where the nucleation event  
527 was visible. The measurement of number of MTs ( $N(t)$ ) nucleated versus time was generated from  
528 a manual log containing the nucleation time for all MTs observed in the field of view, and a  
529 representative set of curves is displayed in Fig. 1F. A straight line was fit to the initial (linear)  
530 region of each  $N(t)$  versus  $t$  curve, rate of nucleation was obtained slope of each linear fit, and its  
531 power-law relation with tubulin concentration was obtained and reported (Fig. 1G).

532

### 533 **Spontaneous microtubule nucleation and data analysis**

534 Spontaneous MT assembly was visualized similar to  $\gamma$ -TuRC-mediated nucleation with the  
535 following changes. The pluronic, casein and NeutrAvidin incubations were performed identical to  
536  $\gamma$ -TuRC nucleation assay but instead of attaching  $\gamma$ -TuRCs, sucrose-based buffer (of the same  
537 composition as used for  $\gamma$ -TuRC elution) was diluted 5-fold with BRB80, introduced in the flow  
538 chamber and incubated for 10 minutes. Washes were performed with 1 vol of BRB80, nucleation  
539 mix was added, and imaging was performed as described above. MTs nucleate spontaneously in  
540 solution fall down on the coverslip due to depletion forces during the 10 minutes of visualizing the  
541 reaction. The number of MTs nucleated in the field of view were counted manually and plotted in  
542 Fig. 1I.

543

### 544 **Preparation and microtubule assembly from blunt microtubule seeds**

545 Blunt MTs were prepared with GMPCPP nucleotide in two polymerization cycles as described  
546 recently<sup>22</sup>. Briefly, a 50  $\mu$ l reaction mixture was prepared with 20  $\mu$ M bovine brain tubulin with  
547 5% Alexa-568 labeled tubulin and 5% biotin-labeled tubulin, 1mM GMPCPP (Jena Bioscience)  
548 in BRB80 buffer, incubated on ice for 5 minutes, then incubated on 37°C for 30 minutes to  
549 polymerize MTs, and MTs were pelleted by centrifugation at 126,000 xg for 8 minutes at 30°C in  
550 TLA100 (Beckman Coulter). Supernatant was discarded, MTs were resuspended in 80% original  
551 volume of BRB80, incubated on ice for 20 minutes to depolymerize MTs, fresh GMPCPP was  
552 added to final 1mM, incubated on ice for 5 minutes, a second cycle of polymerization was  
553 performed by incubating the mixture at 37°C for 30 minutes, and MTs were pelleted again by  
554 centrifugation. Supernatant was discarded and MTs were resuspended in 200  $\mu$ l warm BRB80,

555 flash frozen in liquid nitrogen in 5 $\mu$ l aliquots, stored at -80°C and found to be stable for months.  
556 To verify that these MT seeds have blunt ends, frozen aliquots were quickly thawed at 37°C,  
557 diluted 20-fold with warm BRB80, and incubated at room temperature for 30 minutes to ensure  
558 blunt ends as described previously<sup>22</sup>. MTs were pipetted onto CF400-Cu grids (Electron  
559 Microscopy Sciences), incubated at room temperature for 60 seconds and then wicked away. 2%  
560 uranyl acetate was applied to the grids for 30 seconds, wicked away, and the grids were air-dried  
561 for 10 minutes. The grids were imaged using Phillips CM100 TEM microscope at 130000 x  
562 magnification and most MT ends were found to be blunt.

563 To assay MT assembly from blunt MT seeds, MT assembly experiments similar to  $\gamma$ -TuRC  
564 nucleation assays were performed with the following variation. A lower concentration 0.05 mg/ml  
565 NeutrAvidin (A2666, ThermoFisher) was attached, and washes were performed with warm  
566 BRB80 prior to attaching MTs. One aliquot of MT seeds was thawed quickly, diluted to 100-fold  
567 with warm BRB80, incubated in the chamber for 5 minutes, unattached seeds were washed with 1  
568 vol of warm BRB80, and the slide was incubated at room temperature for 30 minutes to ensure  
569 blunt MT ends. Wide bore pipette tips were used for handling MT seeds to minimize the shear  
570 forces that may result in breakage of MTs. Nucleation mix was prepared as described above and a  
571 low  $\alpha\beta$ -tubulin concentration (1.4-8.7  $\mu$ M) was used. MT assembly from blunt seeds was observed  
572 immediately after incubating the slide on the objective heater. Imaging and analysis were  
573 performed as described above for  $\gamma$ -TuRC nucleation assays. However, the probability curves  
574 for MT assembly were obtained (Fig. 2B) by normalizing for the total number of seeds observed  
575 in the field of view. Rate of assembly was plotted against [tubulin concentration -  $C^*$ ], where  $C^*$   
576 represents the critical tubulin concentration below which MT ends do not polymerize obtained  
577 directly from experimental measurements (Fig. S2A-B).

578

579 **Electron microscopy of  $\gamma$ -tubulin filaments *in vitro***

580 Purified  $\gamma$ -tubulin was observed to form higher order oligomers previously using analytical gel  
581 filtration<sup>24</sup>.  $\gamma$ -tubulin filaments were prepared by diluting pure  $\gamma$ -tubulin to 1-5  $\mu$ M to the buffer  
582 50mM K-MES pH 6.6, 5mM MgCl<sub>2</sub>, 1mM EGTA, 100mM KCl.  $\gamma$ -tubulin mixture were pipetted  
583 onto CF400-Cu grids (Electron Microscopy Sciences), incubated at room temperature for 60  
584 seconds and then wicked away. 2% uranyl acetate was applied to the grids for 30 seconds, wicked  
585 away, and the grids were air-dried for 10 minutes. The grids were imaged using Phillips CM100  
586 TEM microscope at 130000 x magnification and  $\gamma$ -tubulin filaments were seen to form. At 500  
587 mM KCl,  $\gamma$ -tubulin filaments were not seen.

588

589 **Nucleation of microtubules from purified  $\gamma$ -tubulin**

590 MT assembly experiments from purified  $\gamma$ -tubulin was performed similar to  $\gamma$ -TuRC nucleation  
591 assays described above with following variation. No avidin was attached to the coverslips, and  
592 varying concentration of  $\gamma$ -tubulin was prepared by diluting purified  $\gamma$ -tubulin in a high salt buffer  
593 (50mM K-MES pH 6.6, 500mM KCl, 5mM MgCl<sub>2</sub>, 1mM EGTA), centrifuging to remove  
594 aggregates separately for 12 minutes in TLA100 before adding to the nucleation mix containing  
595 15  $\mu$ M  $\alpha\beta$ -tubulin (5% Cy5-labeled) with BSA, glucose oxidase and catalase as described above.  
596 The reaction mixture was introduced into the flow chamber and imaged via TIRF microscopy. A  
597 large number of MTs get nucleated immediately in the presence of 250 nM-1000 nM  $\gamma$ -tubulin.

598

599 **Measurement of affinity between purified  $\gamma$ -tubulin and  $\alpha\beta$ -tubulin**

600 Interaction assays between  $\alpha\beta$ -tubulin and  $\gamma$ -tubulin were performed with biolayer interferometry  
601 using Octet RED96e (ForteBio) instrument in an 8-channel plate format. The plate temperature  
602 was held at 33°C and the protein samples were shaken at 400 rpm during the experiment. First,  
603 Streptavidin or anti-His antibody coated biosensors (ForteBio) were rinsed in interaction buffer  
604 (50mM K-MES pH 6.6, 100mM KCl, 5mM MgCl<sub>2</sub>, 1mM EGTA, 0.05% Tween20, 1mM GTP).  
605 100 nM biotin-labeled  $\alpha\beta$ -tubulin, or blank buffer, was bound to Streptavidin sensor, or 200 nM  
606 His-tagged  $\gamma$ -tubulin to anti-His sensor until loaded protein results in a wavelength shift ( $\Delta\lambda$ ) of 3  
607 nm. Unbound protein was removed by rinsing the sensor in interaction buffer, and interaction with  
608  $\alpha\beta$ -tubulin was measured by incubating the sensor containing  $\alpha\beta$ -tubulin,  $\gamma$ -tubulin or buffer with  
609 0-35  $\mu$ M unlabeled  $\alpha\beta$ -tubulin in interaction buffer for 5 minutes.  $\Delta\lambda$  (nm) was recorded as a  
610 measure of the amount of unlabeled  $\alpha\beta$ -tubulin that binds to the sensor. Longitudinal interaction  
611 occurs between  $\alpha\beta$ -tubulin dimers and the resulting protofilaments were verified by visualizing  
612 the  $\alpha\beta$ -tubulin sample stained with 2% uranyl acetate using electron microscopy as described  
613 above (Fig. S2D).

614

### 615 **Simulation of site occupation on $\gamma$ -TuRC by $\alpha\beta$ -tubulin dimers**

616 A simulation was performed in MATLAB for occupation of sites on  $\gamma$ -TuRC by  $\alpha\beta$ -tubulin dimers.  
617 A circular grid was simulated with 13 empty positions that were occupied one per unit time  
618 stochastically such that a new position was selected by uniform random number generator and  
619 filled. If a previously filled position was selected, a different position was selected by the random  
620 number generator. The sequence in which the sites were occupied was followed. For each  
621 simulation, the total number of sites that were occupied when the first two neighboring sites are

622 filled was recorded. The simulation was repeated 10,000 times and the probability of occurrence  
623 of first neighbor contact versus number of sites occupied is displayed in Fig. 2H.

624

### 625 **Measuring the effect of microtubule associated proteins on $\gamma$ -TuRC's activity**

626 Effect of microtubule associated proteins (MAPs) was measured on  $\gamma$ -TuRC's nucleation activity.  
627  $\gamma$ -TuRC was attached on the coverslips using the setup described above and a control experiment  
628 was performed with identical reaction conditions for each protein tested. Nucleation mix was  
629 prepared containing 10.5  $\mu$ M  $\alpha\beta$ -tubulin concentration (5% Cy5-labeled tubulin) as specified along  
630 with 1mg/ml BSA and oxygen scavengers, and either buffer (control), 10nM GFP-TPX2, 100nM  
631 EB1-mCherry, 5  $\mu$ M Stathmin or 10nM MCAK was added. To test MCAK's effect, the assay  
632 buffer additionally contained 1mM ATP. The reaction mixture containing tubulin and MAP at  
633 specified concentration was introduced into the flow chamber containing  $\gamma$ -TuRC, and MT  
634 nucleation was visualized by imaging the Cy5-fluorescent channel at 0.5-1 frames per second. For  
635 TPX2 and EB1, fluorescence intensity of the protein was simultaneously acquired. The number of  
636 MTs nucleated over time was measured as described above and the effect of protein on  $\gamma$ -TuRC's  
637 nucleation activity was assessed by comparing nucleation curves with and without the MAP.

638 A similar set of experiments were performed to study the effect of XMAP215 on  $\gamma$ -TuRC-  
639 mediated nucleation with the single molecule assays with the following differences. 20 nM of  
640 XMAP215-GFP was added to nucleation mix prepared with 3.5-7  $\mu$ M  $\alpha\beta$ -tubulin concentration  
641 (5% Cy5-label) in XMAP assay buffer (80mM K-PIPES, 1mM MgCl<sub>2</sub>, 1mM EGTA, 30mM KCl,  
642 0.075% w/v methylcellulose 4000 cp, 1% w/v D-(+)-glucose, 0.007% w/v Brij-35, 5mM BME,  
643 1mM GTP). MTs nucleated from attached  $\gamma$ -TuRC with and without XMAP215 were measured to  
644 assess the efficiency of nucleation induced by XMAP215 (Fig. 3C). To assess if C-terminal of



645 XMAP215 increases nucleation efficiency, wild-type XMAP215 was replaced with a C-terminal  
646 construct of XMAP215: TOG5-Cterminus-GFP in the described experiment.

647 To measure the kinetics of cooperative nucleation XMAP215 and  $\gamma$ -TuRC, a constant  
648 density of  $\gamma$ -TuRC was attached as described above and nucleation mix nucleation mix was  
649 prepared with a range of  $\alpha\beta$ -tubulin concentration between 1.6-7  $\mu$ M (5% Cy5-label) with 20 nM  
650 of XMAP215-GFP in XMAP assay buffer, introduced into reaction chamber and MT nucleation  
651 was imaged immediately by capturing dual color images of XMAP215 and tubulin intensity at 0.5  
652 frames per second.

653

#### 654 **Triple-color imaging of XMAP215, $\gamma$ -TuRC and microtubules**

655 For triple-color fluorescence assays (Fig. 3D), Alexa-568 and biotin-conjugated  $\gamma$ -TuRC was first  
656 attached to coverslips as described above with the following variation: 0.05 mg/ml of NeutrAvidin  
657 was used for attaching  $\gamma$ -TuRC. Nucleation mix was prepared with 7  $\mu$ M  $\alpha\beta$ -tubulin (5% Cy5-  
658 label), 10 nM Alexa-488 SNAP-tagged XMAP215 with BSA and oxygen scavengers in XMAP  
659 assay buffer (80mM K-PIPES, 1mM  $MgCl_2$ , 1mM EGTA, 30mM KCl, 0.075% w/v  
660 methylcellulose 4000 cp, 1% w/v D-(+)-glucose, 0.007% w/v Brij-35, 5mM BME, 1mM GTP)  
661 and introduced into the reaction chamber containing attached  $\gamma$ -TuRC. Three-color imaging per  
662 frame was performed with sequential 488, 568 and 647 nm excitation and images were acquired  
663 with EMCCD camera at 0.3 frames per second.

664 **Figure legends**

665

666 **Figure 1. Microtubule nucleation by  $\gamma$ -TuRC.**

667 (A) Schematic of  $\gamma$ -TuRC mediated nucleation based on template model. (B) Purified, biotinylated  
668  $\gamma$ -TuRC molecules were attached and time-lapse of MT nucleation is shown. Arrows point to  
669 nucleation sites. Representative kymographs of MTs nucleated from  $\gamma$ -TuRC are displayed in (C).  
670 The experiment and analyses in (B-G) were repeated at least thrice with independent  $\gamma$ -TuRC  
671 preparations. (D) Titrating tubulin concentration with constant the density of  $\gamma$ -TuRC. MT  
672 nucleation from  $\gamma$ -TuRC begins at 7  $\mu$ M tubulin. (E) MT plus-end growth speed increases linearly  
673 with tubulin concentration. Linear fit (red line) with shaded 95% confidence intervals is displayed,  
674 with critical concentration for polymerization as  $C^* = 1.4 \mu$ M. Inset: Number of MTs nucleated  
675 by  $\gamma$ -TuRCs within 120 seconds varies non-linearly with tubulin concentration. (F) Number of  
676 MTs nucleated ( $N(t)$ ) over time ( $t$ ) is plotted for varying tubulin concentration to obtain rate of  
677 nucleation as the slope of the initial part of the curves. (G) Number of tubulin dimers ( $n$ ) in the  
678 critical nucleus on  $\gamma$ -TuRC was obtained as  $3.7 \pm 0.5$  from the equation  $\left. \frac{dN}{dt} \right|_{t \rightarrow 0} = k C_{tub}^n$   
679 displayed on a log-log plot. Data from two independent experiments was pooled and reported. (H)  
680 Spontaneous MT nucleation (schematized) was measured with increasing tubulin concentration  
681 and high concentrations. 14  $\mu$ M tubulin is required. (I) Number of MTs ( $N(t=\tau)$ ) nucleated  
682 spontaneously were plotted against tubulin concentration ( $C_{tub}$ ). Power-law curve was fit as  $N(t=\tau)$   
683  $= k C_{tub}^n$  and tubulin cooperativity (exponent) of  $n = 8 \pm 1$  was obtained. Experiments were  
684 repeated twice independently with many supporting results and all data were pooled. Scale bars,  
685 10  $\mu$ m. See Figure S1 and Movies S1-S4.

686

687 **Figure 2. Molecular mechanism for  $\gamma$ -TuRC-mediated microtubule nucleation.**

688 (A) Schematic and a micrograph of pre-formed, blunt MT seeds is shown and MT assembly from  
689 them was observed (right) with varying tubulin concentration. (B) Cumulative probability of MT  
690 assembly from seeds ( $p(t)$ ) over time ( $t$ ) is plotted and rate of nucleation was obtained as the slope  
691 from initial part of the curves. (C) Tubulin dimers ( $n$ ) needed for MT assembly from seeds was  
692 from the relation  $\left. \frac{dp}{dt} \right|_{t \rightarrow 0} = k(C_{tub} - C^*)^n$  displayed on a log-log plot.  $n = 1.2 \pm 0.4$  showing non-  
693 cooperative assembly of tubulin. (D) MTs nucleate from purified  $\gamma$ -tubulin oligomers efficiently  
694 and (E) minus-ends of  $\gamma$ -tubulin-nucleated MTs remain capped while the plus-ends polymerize.  
695 (F) Molecular interaction between  $\gamma/\alpha\beta$ -tubulin was probed with bio-layer interferometry. Buffer  
696 (left), biotin-tagged  $\alpha\beta$ -tubulin (middle), or His-tagged  $\gamma$ -tubulin (right) were loaded on the probe  
697 as bait and untagged  $\alpha\beta$ -tubulin at 0-35  $\mu$ M as prey. Wavelength shift,  $\Delta\lambda$  (nm) indicated no  
698 binding between empty probe and  $\alpha\beta$ -tubulin or  $\gamma/\alpha\beta$ -tubulin, while that between  $\alpha\beta$ -/ $\alpha\beta$ -tubulin  
699 was observed and confirmed to be longitudinal (protofilament-wise, Fig. S2D). (G) Interface  
700 interaction model determines MT nucleation by  $\gamma$ -TuRC where lateral  $\gamma/\gamma$ -tubulin promote  
701 nucleation while low  $\gamma/\alpha\beta$ -tubulin affinity tunes nucleation. (H) Simulations were conducted where  
702 13 sites on  $\gamma$ -TuRC were stochastically occupied by  $\alpha\beta$ -tubulins. For two  $\alpha\beta$ -tubulin subunits to  
703 form lateral bond by occupying neighboring sites,  $3.7 \pm 1$  subunits bind on average on  $\gamma$ -TuRC,  
704 predicting the size of critical nucleus. Experiments and analyses were repeated at least twice  
705 independently with multiple supporting results. Scale bars, 10  $\mu$ m. See Figure S2 and Movie S5-  
706 6.

707  
708 **Figure 3. Regulation of microtubule nucleation by TPX2 and XMAP215.**

709 (A) A constant density of  $\gamma$ -TuRC molecules were attached and  $10.5\mu\text{M}$  tubulin  $\pm 10\text{nM}$  GFP-  
710 TPX2 were added. MTs were counted (right plot) and TPX2 was did not affect  $\gamma$ -TuRC-mediated  
711 nucleation. Scale bar,  $10\mu\text{m}$ . (B)  $\gamma$ -TuRCs were attached and low concentration  $3.5\text{-}7\mu\text{M} \pm 20\text{nM}$   
712 XMAP215 was added. XMAP215 induces MT nucleation from  $\gamma$ -TuRC efficiently. (C) MT  
713 nucleation events were counted and plotted. Scale bar,  $10\mu\text{m}$ . (D) Sequence of events during  
714 cooperative MT nucleation by  $\gamma$ -TuRC and XMAP215 was visualized using labeled  $\gamma$ -TuRC  
715 (blue), XMAP215 (red) and tubulin (green). Time-lapse:  $\gamma$ -TuRC and XMAP215 form a complex  
716 prior to MT nucleation. XMAP215 variably resides on  $\gamma$ -TuRC for long ( $>100$  seconds,  
717 kymograph 1) or short times ( $\sim 3\text{-}10$  seconds, kymograph 2) before MT nucleation and remains at  
718 the minus-end with 50% probability. Scale bar,  $5\mu\text{m}$ . (E) Titrating tubulin with constant  $\gamma$ -TuRC  
719 and XMAP215 concentration. XMAP215/ $\gamma$ -TuRC nucleate MTs from  $1.6\mu\text{M}$  tubulin. Number of  
720 MTs nucleated ( $N(t)$ ) over time ( $t$ ) is plotted (inset) and rate of nucleation was obtained. Tubulin  
721 dimers ( $n$ ) in critical nucleus was obtained as  $3.2 \pm 1.2$  and displayed on a log-log plot. The  
722 experiment was performed once for all concentrations denoted and supported by a number of  
723 additional experiments. The remaining experiments were repeated more than twice with  
724 independent  $\gamma$ -TuRC preparations with additional supporting results. See Figure S3-4 and Movies  
725 S7-10.

726

727 **Supplementary Figure legends**

728

729 **Supplementary Figure 1. Controls for  $\gamma$ -TuRC-mediated and spontaneous microtubule**  
730 **nucleation.**

731 (A-B) Protein gel (left) of purified  $\gamma$ -TuRC was stained with SYPRO Ruby stain and biotinylated  
732 sites on  $\gamma$ -TuRC visualized with alkaline phosphatase conjugated to avidin (right). Major, known  
733  $\gamma$ -TuRC components were detected in the purified protein and GCP2/3 are heavily biotinylated  
734 during purification. Purified and biotinylated  $\gamma$ -TuRC was stained with uranyl acetate and  
735 visualized with transmission electron microscopy. Scale bar, 100nm. The experiments were  
736 repeated at least thrice with independent  $\gamma$ -TuRC preparations.

737 (C) Covalent-reaction of biotin with  $\gamma$ -TuRC does not affect the nucleation activity, as measured  
738 by attaching  $\gamma$ -TuRC with anti-Mozart1 antibody and comparing the number of MTs nucleated by  
739 untagged and biotinylated  $\gamma$ -TuRC. Scale bar, 10 $\mu$ m.

740 (D) Control reactions for  $\gamma$ -TuRC-mediated nucleation. MTs were nucleated by attaching purified  
741  $\gamma$ -TuRC (left), adding control buffer (middle) or missing avidin in the reaction sequence (right).  
742 Robust MT nucleation only occurs with  $\gamma$ -TuRC attached to coverslips and not in control reactions.  
743 Scale bar, 10 $\mu$ m. See Movie S2.

744 (E) MTs were first nucleated from  $\gamma$ -TuRC with Alexa 568-labeled tubulin (cyan), followed by  
745 introduction of Cy5-labeled tubulin (magenta). New tubulin only incorporates on the freely  
746 growing, plus-end but not at the nucleated minus-end. Scale bar, 10 $\mu$ m. The experiment was  
747 performed more than three times.

748 (F) Two representative kymographs of spontaneously nucleated MTs are displayed, demonstrating  
749 that MTs grow from both the minus-end (dotted line) and the plus-end (solid line). Scale bar,  
750 10 $\mu$ m. See Movie S4.

751 (G) MTs nucleation from  $\gamma$ -TuRCs or spontaneously were compared at two tubulin  
752 concentrations: 10.5  $\mu$ M and 14  $\mu$ M.  $\gamma$ -TuRC nucleates 10-fold higher number of MTs than  
753 spontaneous assembly. The experiment was performed twice with many supporting results.

754 See also Figure 1.

755

756 **Supplementary Figure 2. Microtubule assembly from blunt seeds and filament formation by**  
757 **purified  $\gamma$ -tubulin.**

758 (A) MT assembly (magenta) from MT seeds with blunt ends (cyan) was assayed. Tubulin  
759 concentration was titrated, and MT plus-end assembles starting from 2.45  $\mu$ M tubulin, which is  
760 only slightly above the critical concentration of polymerization. Scale bar, 10 $\mu$ m.

761 (B) Growth speed of MT plus-ends was measured from kymographs and critical concentration ( $C^*$   
762 = 1.4  $\mu$ M) was determined from the linear fit (red line) with shaded 95% confidence intervals. The  
763 experiment and analyses in were repeated twice on independent days along with other supporting  
764 data. See also Figure 2 and Movie S5.

765 (C)  $\gamma$ -tubulin self-assembles into filaments at high concentration and low-salt (100mM KCl) as  
766 imaged with negative-stain electron microscopy, whereas  $\gamma$ -tubulin filaments were not observed  
767 at high-salt (500mM KCl). Scale bar, 100nm.

768 (D) Transmission electron microscopy of bio-layer interferometry assay of Fig. 2F show that  
769 protofilaments of  $\alpha\beta$ -tubulin form. The experiment was repeated twice. Scale bar, 100nm.

770

771 **Supplementary Figure 3. Effect of microtubule associated proteins on  $\gamma$ -TuRC-mediated**  
772 **nucleation.**

773 (A)  $\gamma$ -TuRC molecules were attached to coverslips and either tubulin alone (pseudo-colored as  
774 magenta, left) or tubulin with 100nM EB1-mCherry (pseudo-colored as cyan, right) was added to  
775 the reaction. Number of MTs nucleated were measured (right plot) and EB1 was observed to  
776 neither increase nor decrease  $\gamma$ -TuRC-mediation nucleation despite functioning as a catastrophe  
777 factor *in vitro*. The experiment was repeated at least twice with independent  $\gamma$ -TuRC preparation.  
778 See also Movie S8. Scale bar, 10 $\mu$ m.

779 (B)  $\gamma$ -TuRC molecules were attached to coverslips and either tubulin alone (left images), tubulin  
780 with 10nM MCAK (top right) or tubulin with 5 $\mu$ M Stathmin (bottom right) was added to the  
781 reaction. Both MCAK and Stathmin were observed to decrease the number of MTs nucleated  
782 because of their role in decreasing the net polymerization of a MT. The experiment was repeated  
783 at least twice with independent  $\gamma$ -TuRC preparations. Scale bar, 10 $\mu$ m.

784

785 **Supplementary Figure 4. Cooperative microtubule nucleation XMAP215 and  $\gamma$ -TuRC.**

786 (A)  $\gamma$ -TuRC molecules were attached and increasing concentration of tubulin was added with  
787 20nM XMAP215. XMAP215 was found to induce MT nucleation from  $\gamma$ -TuRC molecules at even  
788 low tubulin concentration of 1.6-3.5  $\mu$ M where  $\gamma$ -TuRCs alone do not nucleate MTs. See Figure  
789 3E. Scale bar, 10 $\mu$ m.

790 (B) The role of C-terminal region of XMAP215 was tested in cooperative nucleation with  $\gamma$ -TuRC.  
791 MTs nucleated by  $\gamma$ -TuRC alone (left),  $\gamma$ -TuRC with 20nM full-length XMAP215 (middle) or  $\gamma$ -  
792 TuRC with 20nM C-terminal domain of XMAP215 were visualized. The C-terminal domains of

793 XMAP215 do not stimulate MT nucleation from  $\gamma$ -TuRC. The experiment was repeated twice with  
794 independent  $\gamma$ -TuRC preparations. Scale bar, 10 $\mu$ m.

795



796 **Movie Legends**

797

798 **Movie 1. Microtubule nucleation from  $\gamma$ -TuRC complexes**

799  $\gamma$ -TuRC was attached to functionalized coverslips and MT nucleation was observed upon  
800 introducing fluorescent  $\alpha\beta$ -tubulin (gray). MTs nucleated from individual  $\gamma$ -TuRC molecules from  
801 zero length at 15 $\mu$ M  $\alpha\beta$ -tubulin and the plus-end of nucleated MTs polymerized, but not its minus-  
802 end. Elapsed time is shown in seconds, where time-point zero represents the start of reaction. Scale  
803 bar, 10  $\mu$ m.

804

805 **Movie 2. Microtubule nucleation from  $\gamma$ -TuRC is specific**

806  $\gamma$ -TuRC was immobilized on coverslips (leftmost panel) and MT nucleation was observed upon  
807 introducing fluorescent  $\alpha\beta$ -tubulin (gray). Control reactions where either no  $\gamma$ -TuRC was added  
808 (middle panel) or  $\gamma$ -TuRC was not specifically attached (rightmost panel) did not result in MT  
809 nucleation. Elapsed time is shown in seconds, where time-point zero represents the start of  
810 reaction. Scale bar, 10  $\mu$ m.

811

812 **Movie 3.  $\gamma$ -TuRC molecules nucleated microtubules efficiently**

813 Constant density of  $\gamma$ -TuRC was attached while concentration of fluorescent  $\alpha\beta$ -tubulin was  
814 titrated (3.5-21 $\mu$ M) and MT nucleation was observed.  $\gamma$ -TuRC molecules nucleated MTs starting  
815 from 7 $\mu$ M tubulin and MT nucleation increased non-linearly with increasing tubulin concentration.  
816 Elapsed time is shown in seconds, where time-point zero represents the start of reaction. Scale bar,  
817 10  $\mu$ m.

818

819 **Movie 4. Spontaneous microtubule nucleation occurs at high tubulin concentration**

820 Concentration of fluorescent  $\alpha\beta$ -tubulin was titrated (7-21 $\mu$ M) and spontaneous MT nucleation  
821 was assayed. MTs nucleated spontaneously starting from high concentration of 14 $\mu$ M tubulin and  
822 MT nucleation increased non-linearly with tubulin concentration. Both plus- and minus-ends of  
823 the assembled MTs polymerize. Elapsed time is shown in seconds, where time-point zero  
824 represents the start of reaction. Scale bar, 10  $\mu$ m.

825

826 **Movie 5. Microtubule assembly from blunt plus-ends resembles polymerization**

827 MTs with blunt ends (seeds, cyan) were generated and attached to functionalized coverslips.  
828 Varying concentration of fluorescent  $\alpha\beta$ -tubulin was added (1.4-8.7 $\mu$ M, pseudo-colored as  
829 magenta) and MT assembly from seeds was assayed. MTs assembled at concentration above  
830 1.4 $\mu$ M tubulin, which is the minimum concentration needed for polymerization of MT plus-ends  
831 ( $C^*$ ). MT assembly from seeds increased linearly with the concentration of assembly-competent  
832 tubulin ( $C-C^*$ ). Elapsed time is shown in seconds, where time-point zero represents the start of  
833 reaction. Scale bar, 10  $\mu$ m.

834

835 **Movie 6. Arrays of purified  $\gamma$ -tubulin nucleate microtubules**

836 Purified  $\gamma$ -tubulin nucleated MTs. Fluorescent  $\alpha\beta$ -tubulin (10.5 $\mu$ M, colored as gray) was added to  
837 purified  $\gamma$ -tubulin at increasing concentration, and MT nucleation was assessed. MTs assembled  
838 from 250-1000 nM  $\gamma$ -tubulin, where  $\gamma$ -tubulin alone self-assembled into higher order oligomers  
839 and filaments in lateral  $\gamma/\gamma$ -tubulin arrays. Minus-ends of  $\gamma$ -tubulin-nucleated MTs did not  
840 polymerize, while the plus-ends did. Elapsed time is shown in seconds, where time-point zero  
841 represents the start of reaction. Scale bar, 10  $\mu$ m.

842

843 **Movie 7. TPX2 does not increase  $\gamma$ -TuRC's microtubule nucleation activity**

844  $\gamma$ -TuRC was immobilized on coverslips and MT nucleation was observed upon introducing  
845 fluorescent  $\alpha\beta$ -tubulin (10.5 $\mu$ M, pseudo-colored as magenta) without or with 10nM GFP-TPX2  
846 (pseudo-colored as cyan) in the left and right panels respectively. TPX2 bound along the nucleated  
847 MTs but did not increase the MT nucleation activity of  $\gamma$ -TuRC molecules. Elapsed time is shown  
848 in seconds, where time-point zero represents the start of reaction. Scale bar, 10  $\mu$ m.

849

850 **Movie 8. EB1 does not decrease the microtubule nucleation activity of  $\gamma$ -TuRC**

851  $\gamma$ -TuRC was immobilized on coverslips and MT nucleation was observed upon introducing  
852 fluorescent  $\alpha\beta$ -tubulin (10.5 $\mu$ M, pseudo-colored as magenta) without or with 100nM EB1-  
853 mCherry (pseudo-colored as cyan) in the left and right panels respectively. EB1 binds the plus-  
854 ends of nucleated MTs but did not decrease the MT nucleation activity of  $\gamma$ -TuRC molecules.  
855 Elapsed time is shown in seconds, where time-point zero represents the start of reaction. Scale bar,  
856 10  $\mu$ m.

857

858 **Movie 9. XMAP215 increases microtubule nucleation activity of  $\gamma$ -TuRC**

859  $\gamma$ -TuRC was immobilized on coverslips and MT nucleation was assayed with low concentration  
860 of fluorescent  $\alpha\beta$ -tubulin (3.5 $\mu$ M and 7 $\mu$ M) without (top panels) or with 20nM XMAP215-GFP  
861 (bottom panels). XMAP215 decreased the minimal concentration of tubulin necessary to induce  
862 MT nucleation from  $\gamma$ -TuRC. Elapsed time is shown in seconds, where time-point zero represents  
863 the start of reaction. Scale bar, 10  $\mu$ m.

864

865 **Movie 10. Synergistic microtubule nucleation by  $\gamma$ -TuRC and XMAP215**

866 Triple-color fluorescence microscopy was performed to observe the molecular sequence of events  
867 during MT nucleation from  $\gamma$ -TuRC and XMAP215.  $\gamma$ -TuRC (blue) and XMAP215 (red) formed  
868 a complex before MT nucleation occurred (pseudo-colored as green). For 50% of these events,  
869 XMAP215 remains on the nucleated minus-end. Elapsed time is shown in seconds, where time-  
870 point zero represents the start of reaction. Scale bar, 10  $\mu$ m.

871

# Figure 1

## A $\gamma$ -TuRC-mediated microtubule nucleation

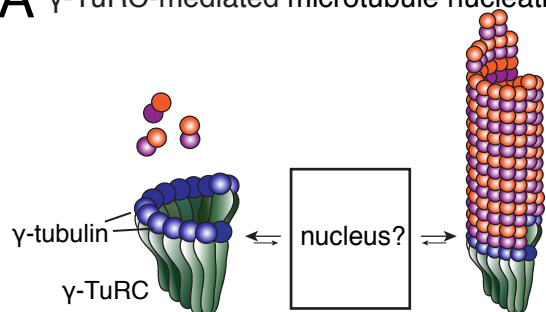

## B Microtubule nucleation from $\gamma$ -TuRC *in vitro*

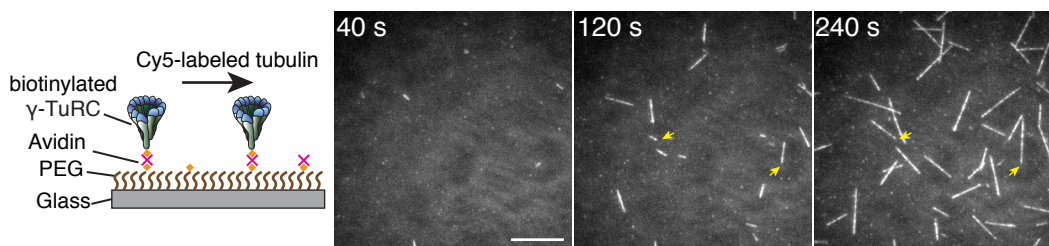

## C Kymographs of $\gamma$ -TuRC nucleated microtubules

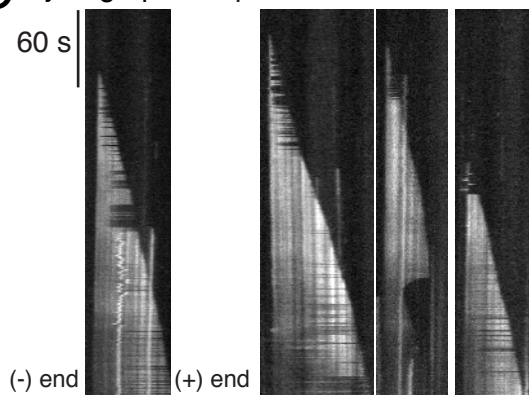

## D Titrating tubulin concentration in $\gamma$ -TuRC-mediated nucleation

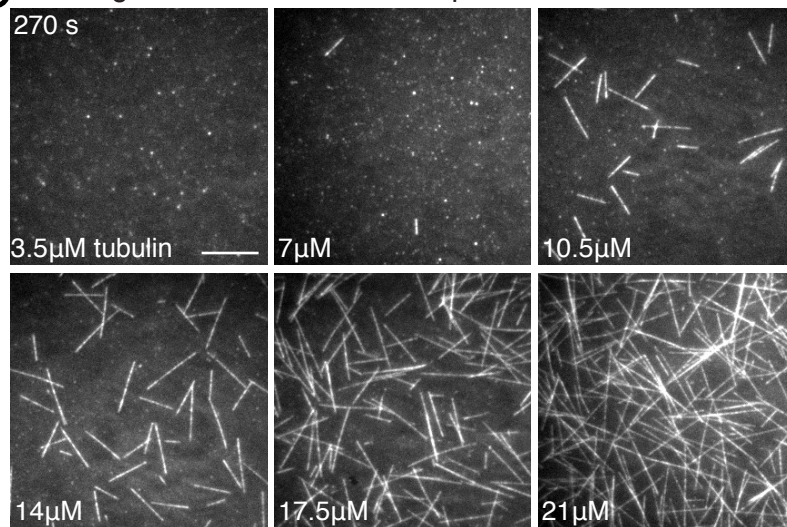

## E Growth speed of plus-end and number of microtubules

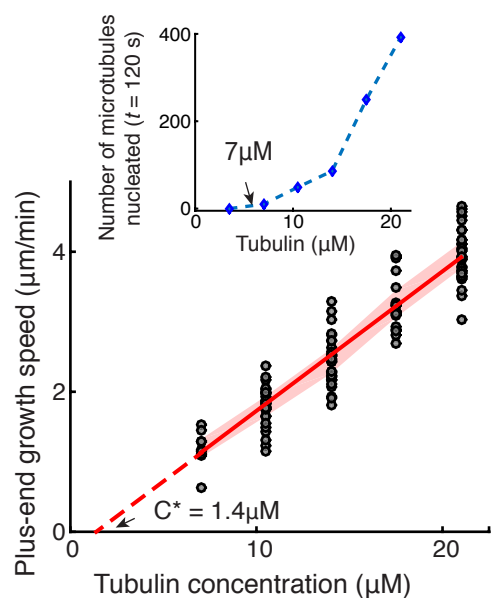

## F Kinetics of microtubule nucleation from $\gamma$ -TuRC

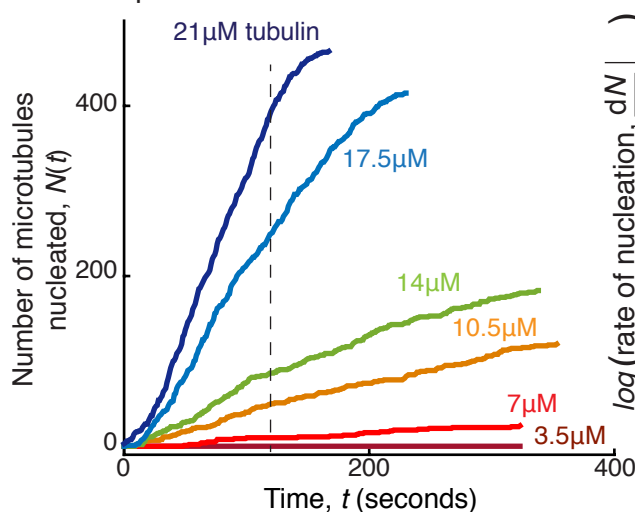

## G Cooperativity of tubulin dimers for $\gamma$ -TuRC mediated nucleation ( $n$ )

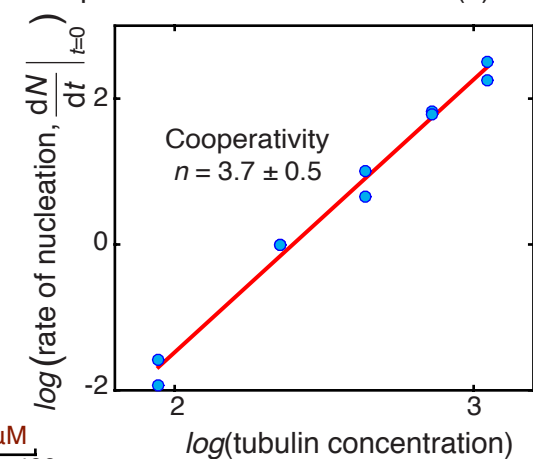

## H Spontaneous microtubule nucleation

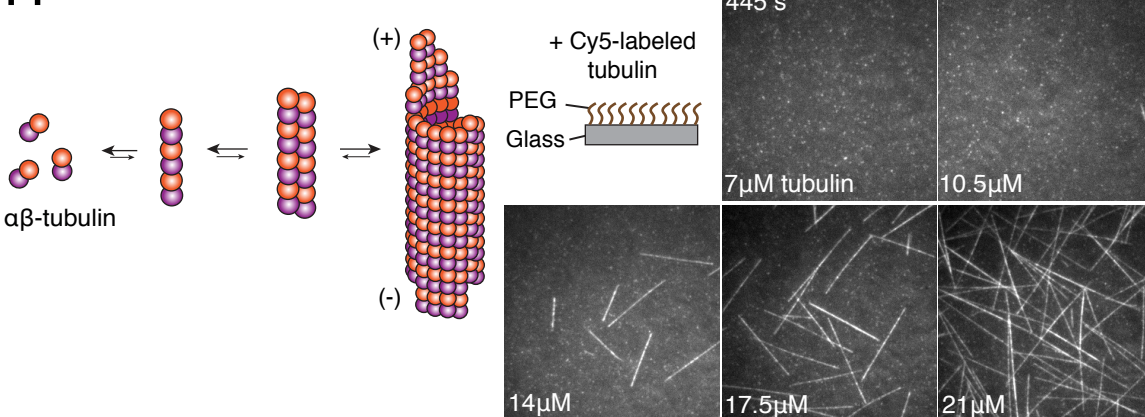

## I Cooperativity of tubulin dimers for spontaneous nucleation ( $n$ )

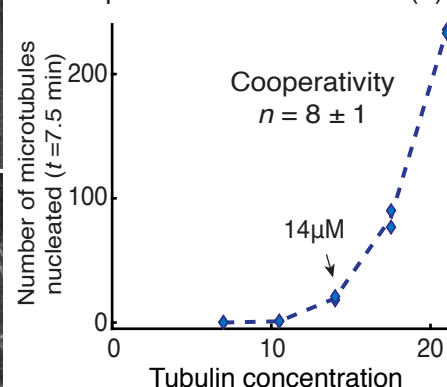



# Figure 2

## A Microtubule assembly from stable seeds *in vitro*

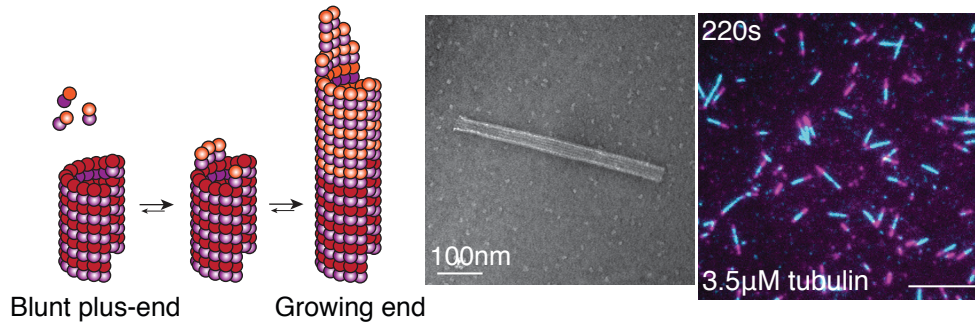

## B Kinetics of assembly from seeds

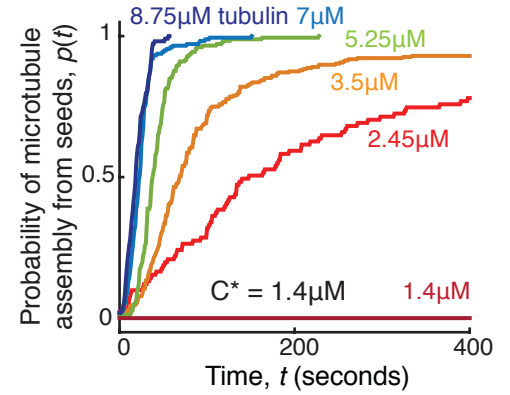

## C Tubulin dimers for microtubule generation from seeds ( $n$ )

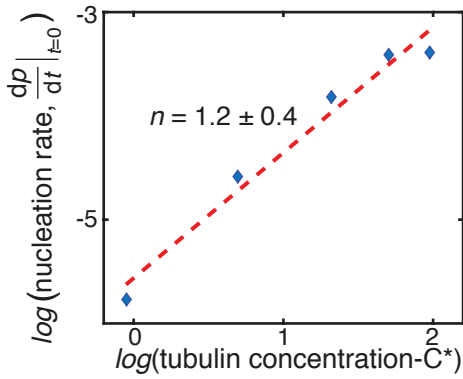

## D Nucleation of microtubules by purified $\gamma$ -tubulin

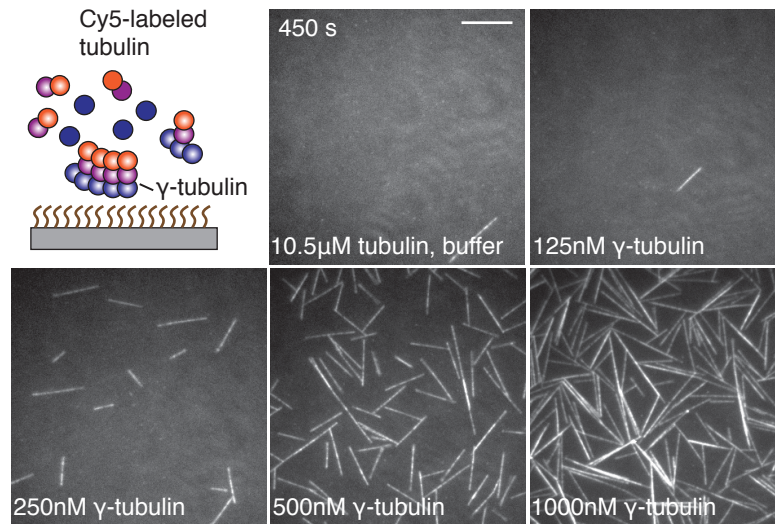

## E Kymographs of $\gamma$ -tubulin nucleated microtubules

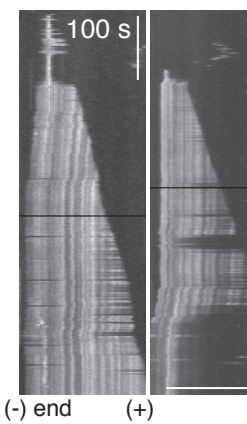

## F Probing interaction between $\gamma$ -tubulin and $\alpha\beta$ -tubulin

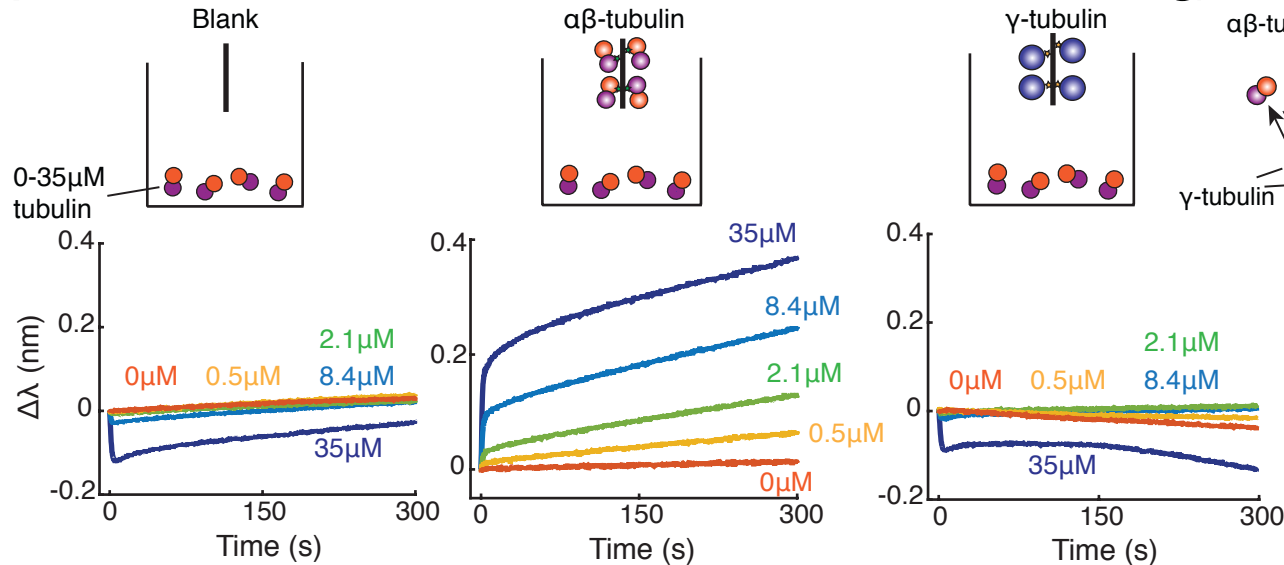

## G Interface interaction model

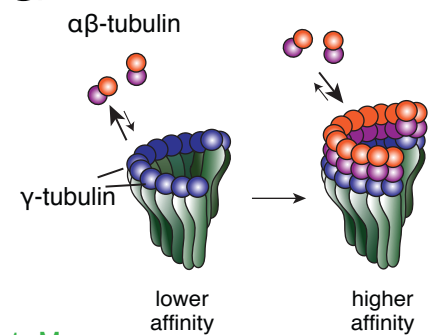

## H Simulation of $\alpha\beta$ -tubulin binding on $\gamma$ -TuRC sites

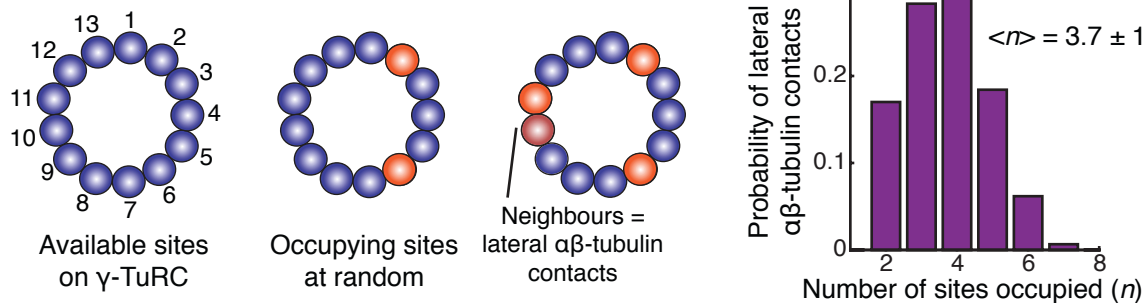

# Figure 3

## A TPX2 does not influence $\gamma$ -TuRC-mediated nucleation

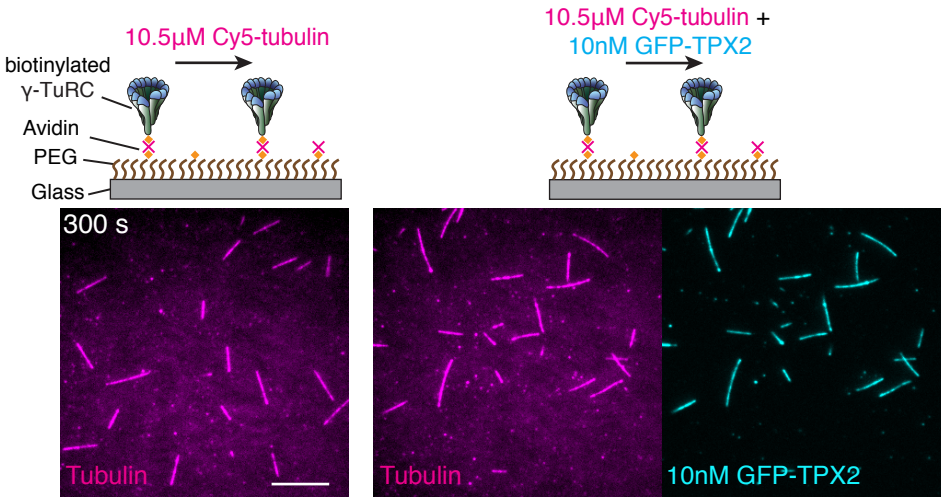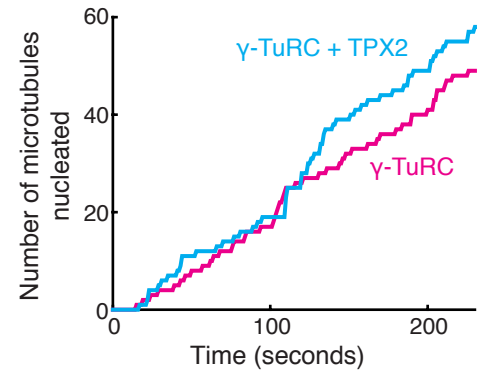

## B XMAP215 decreases the nucleation barrier from $\gamma$ -TuRCs

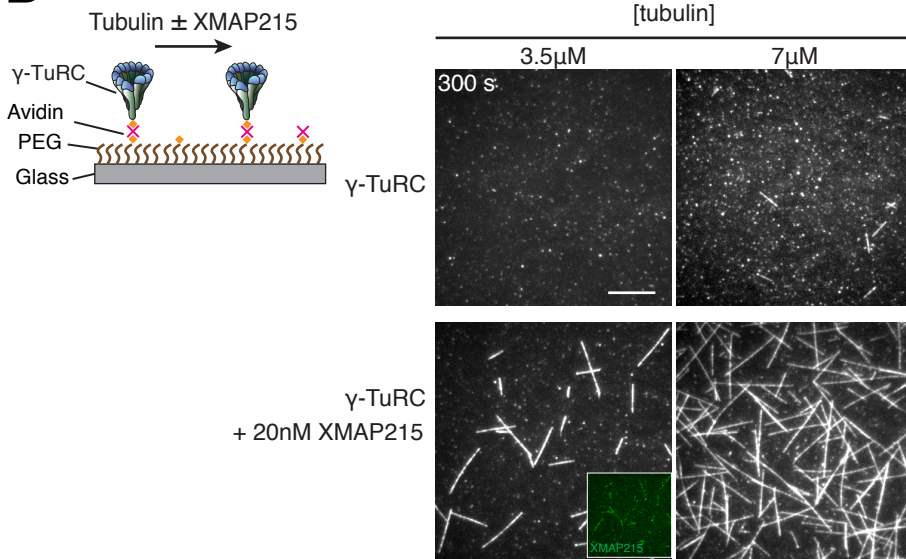

## C Kinetics of microtubule nucleation from $\gamma$ -TuRC with XMAP215

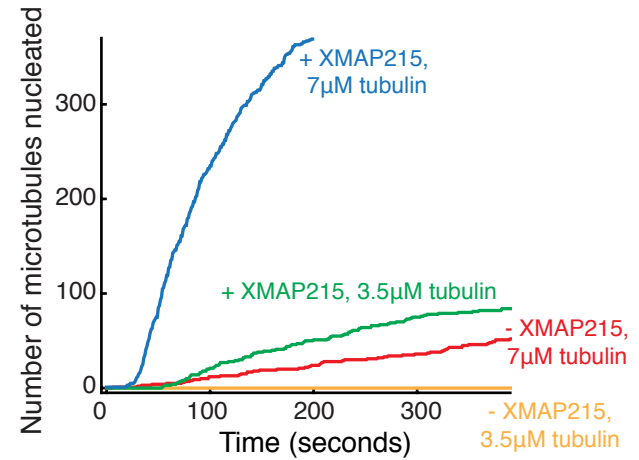

## D XMAP215 binds $\gamma$ -TuRC prior to microtubule nucleation

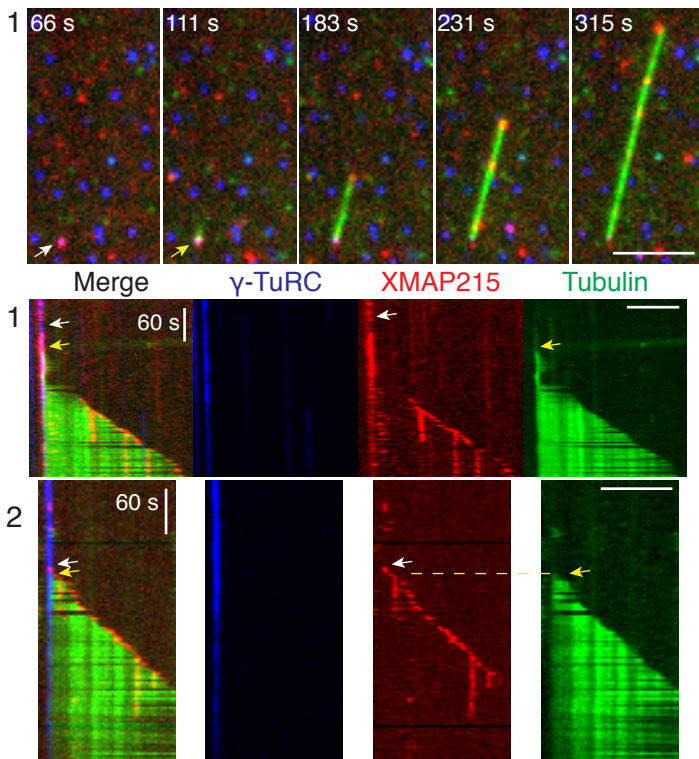

## E Cooperativity of tubulin dimers for co-nucleation by $\gamma$ -TuRC and XMAP215 ( $n$ )

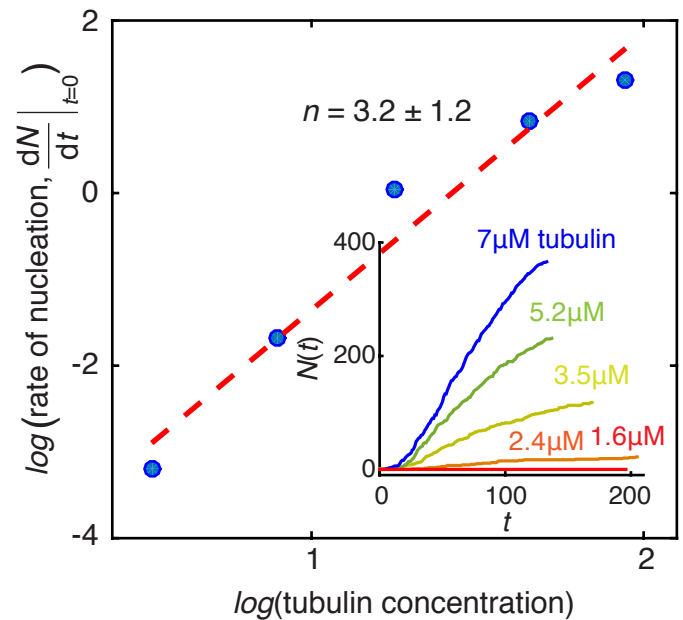



# Figure S1 $\gamma$ -TuRC purification and quality control reactions

## A Purified, biotinylated $\gamma$ -TuRC

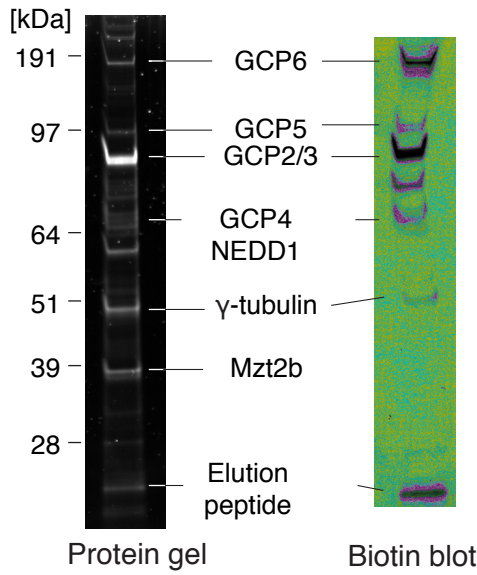

## B Negative stained $\gamma$ -TuRC under electron microscope

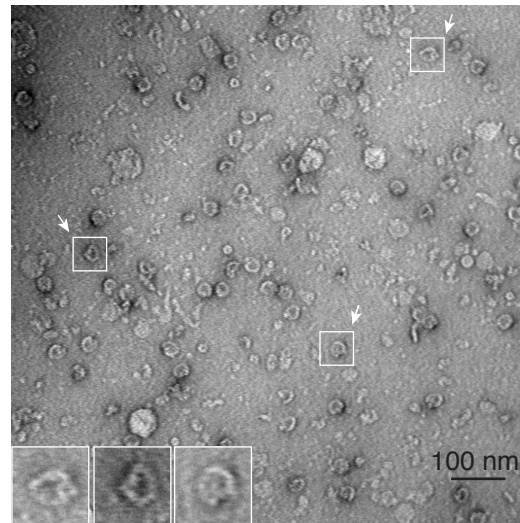

## C Biotinylation of does not decrease the nucleation activity of $\gamma$ -TuRC

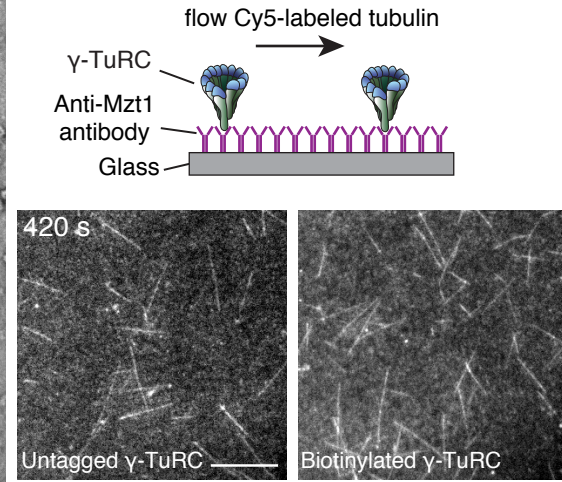

## D Control reactions for *in vitro* nucleation by $\gamma$ -TuRC

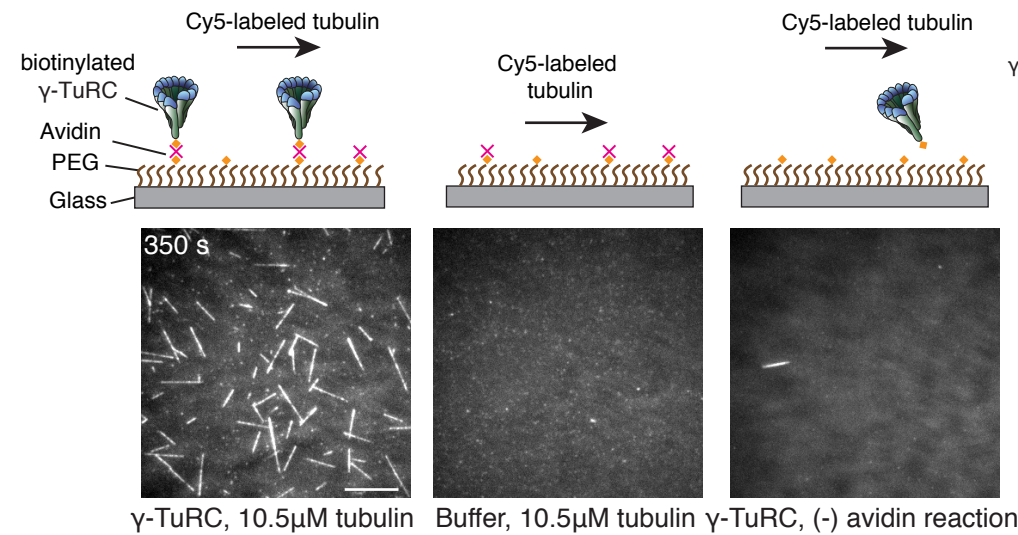

## E Tubulin swap on $\gamma$ -TuRC nucleated MTs

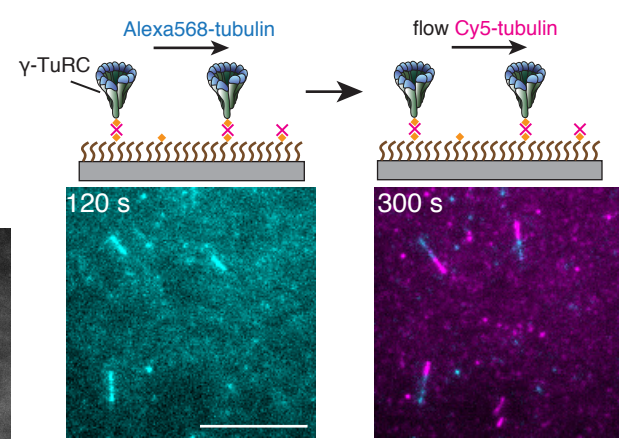

## F Kymographs of spontaneously nucleated microtubules

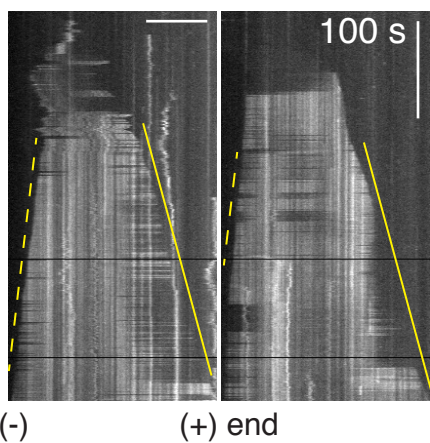

## G Nucleation kinetics from $\gamma$ -TuRCs versus spontaneous assembly

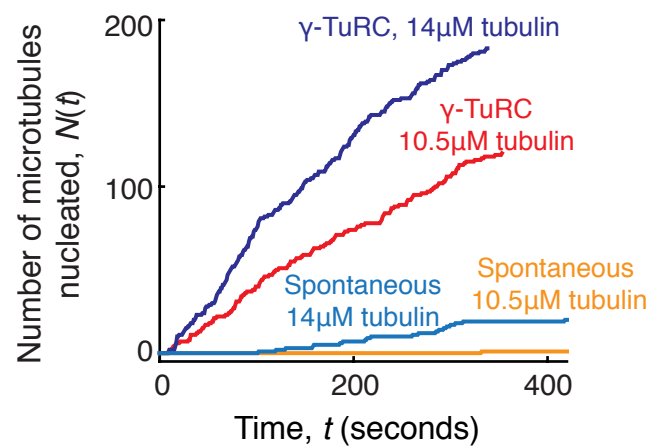



# Figure S2

## A Titrating tubulin on stable microtubule seeds

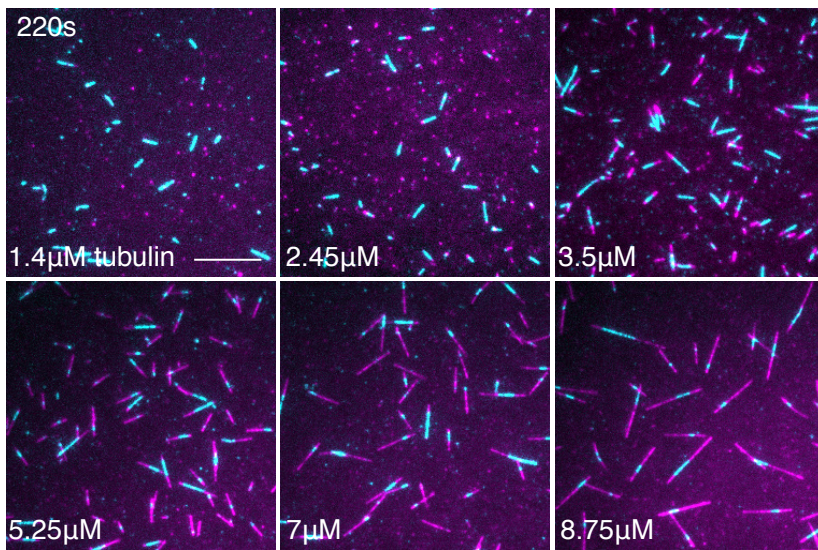

## B Growth speed of microtubule plus-ends

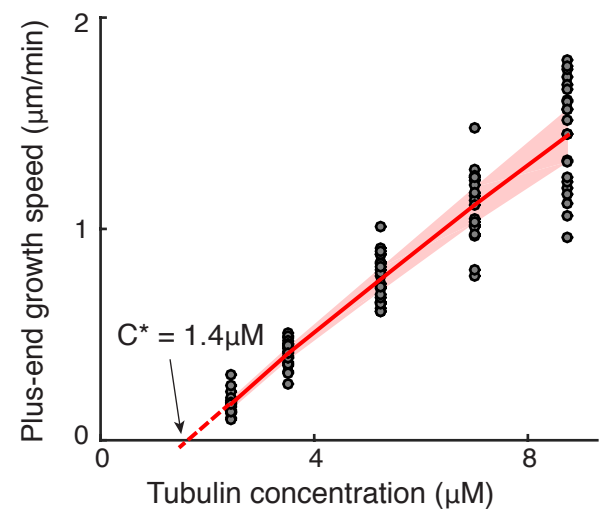

## C $\gamma$ -tubulin filaments form under physiological salt at high concentration *in vitro*

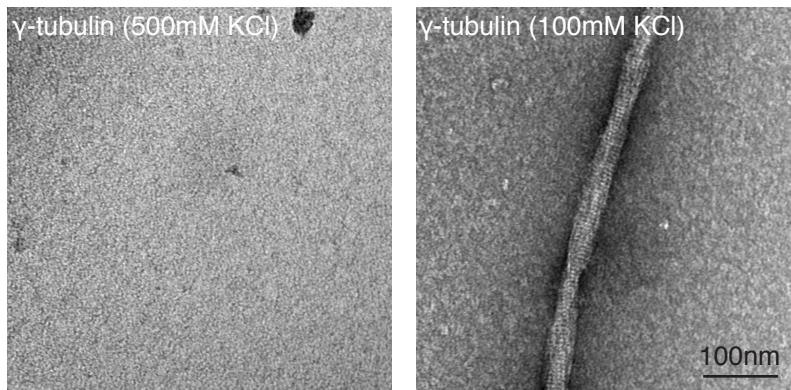

## D $\alpha\beta$ -tubulin protofilaments form under biolayer interferometry

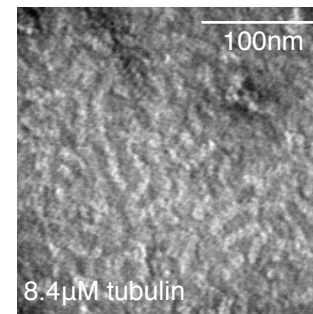

# Figure S3

## A Effect of EB1 on $\gamma$ -TuRC-mediated nucleation

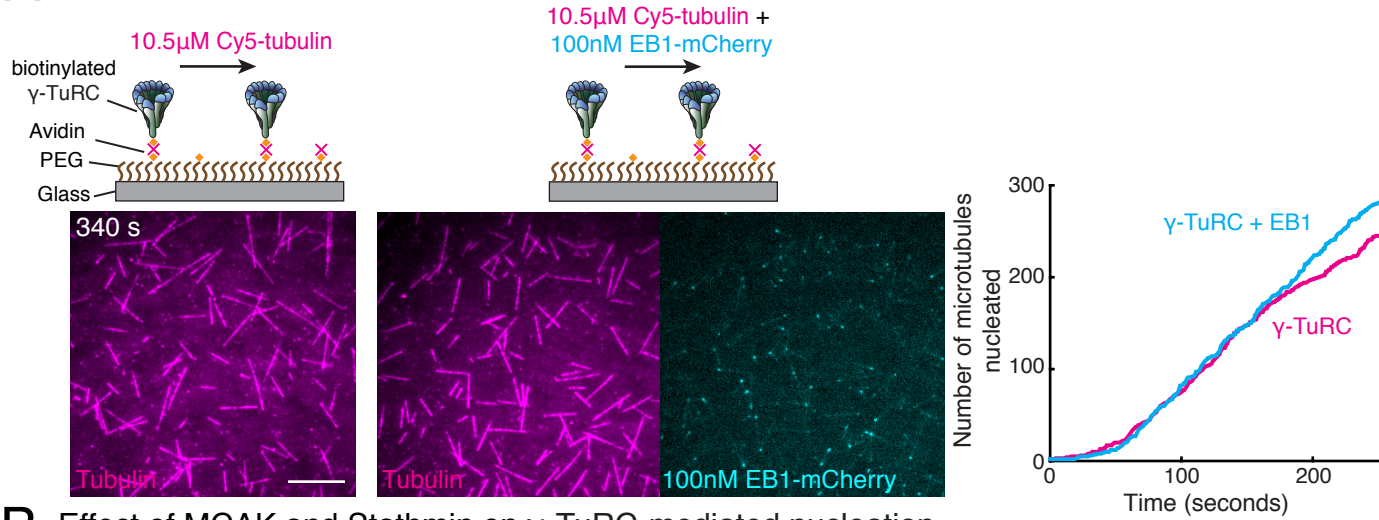

## B Effect of MCAK and Stathmin on $\gamma$ -TuRC-mediated nucleation

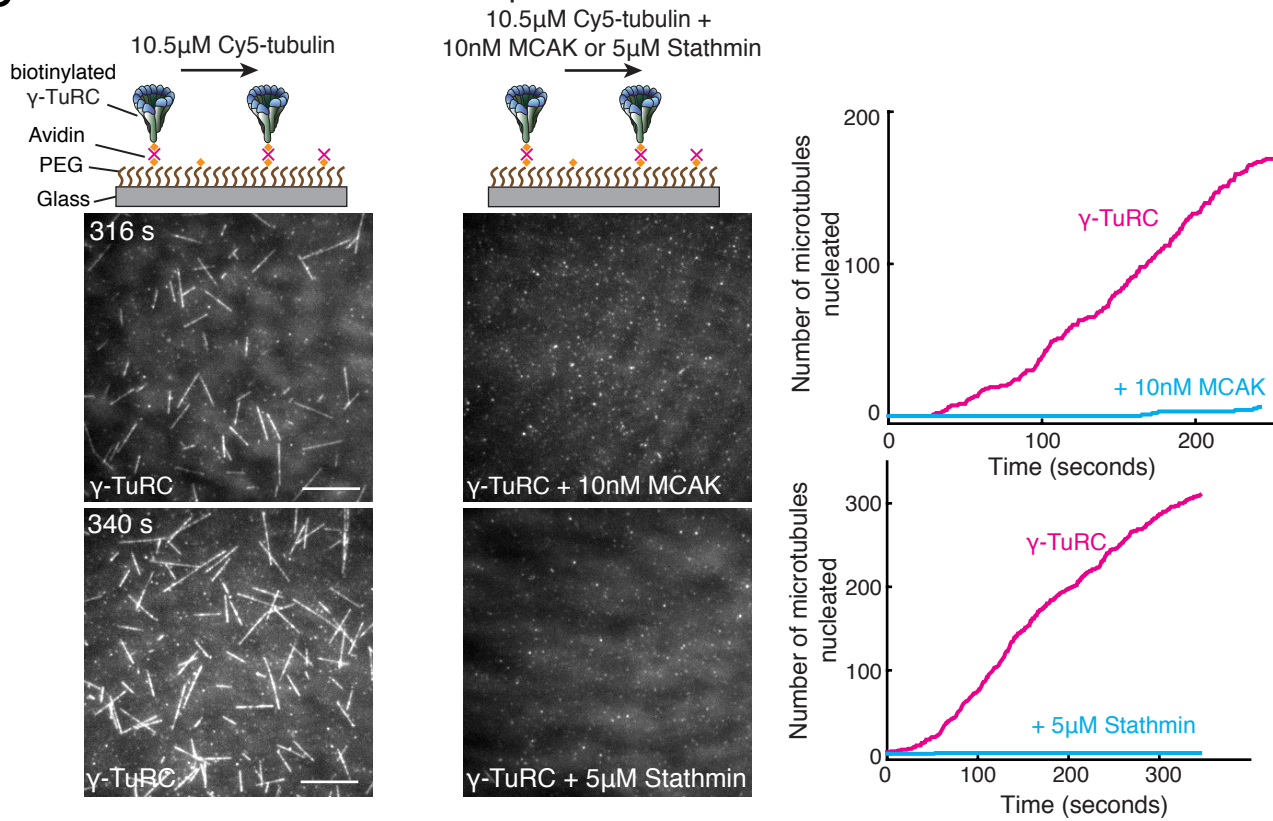

## A Titrating tubulin concentration in $\gamma$ -TuRC/XMAP215-mediated co-nucleation

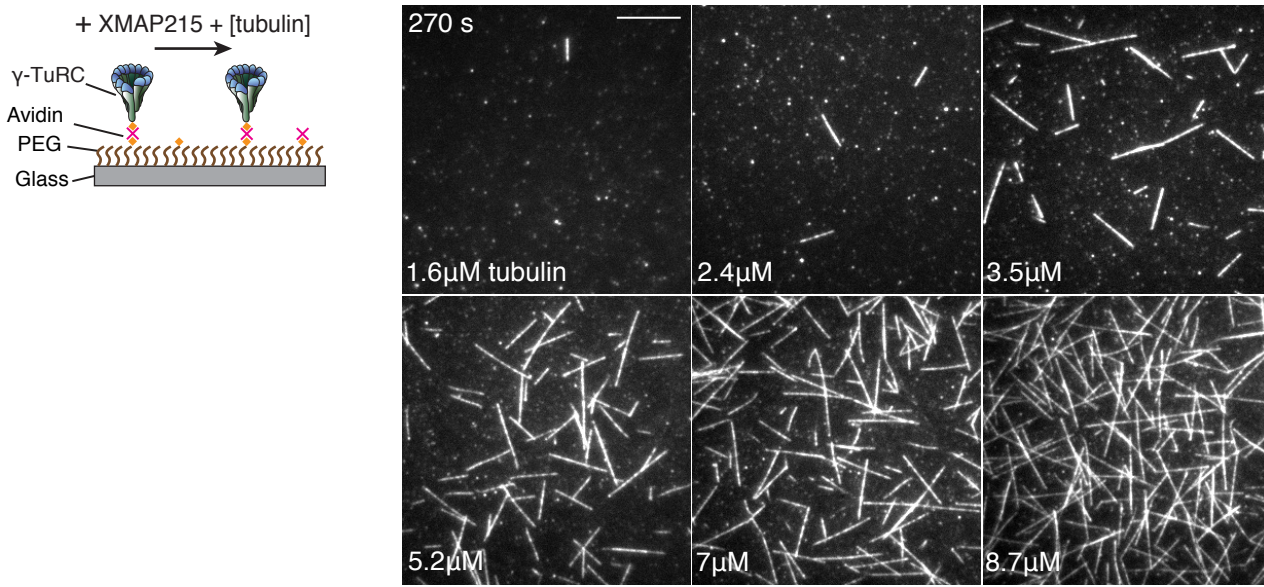

## B C-terminal region of XMAP215 does not stimulate nucleation from $\gamma$ -TuRC

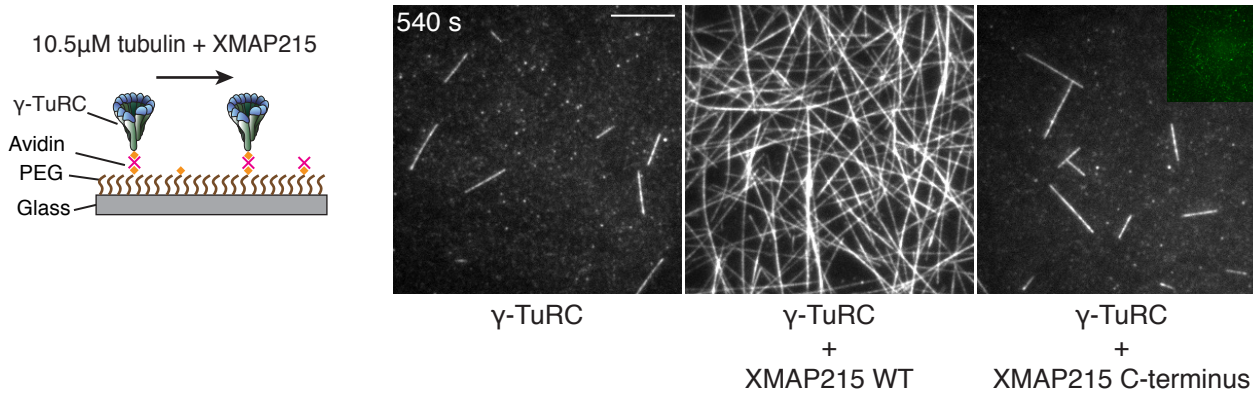

Source: https://www.biorxiv.org/content/10.1101/853010v1.full.pdf
